# Supplementary material for: Gene expression of tight junctions in foreskin is not affected by HIV pre-exposure prophylaxis
Source: PubMed Central journal article supplement (PMC11576434; doi:10.3389/fimmu.2024.1415475), 2024-11-06

**Supplementary Table 1. Description of major TJ gene subfamilies**

| GENE ONTOLOGY CLASS: FUNCTION*                                                                                                                                                                                                                                                                                                        | GENES**                                                                                                                                                                                                                                                                                                                                                                          |
|---------------------------------------------------------------------------------------------------------------------------------------------------------------------------------------------------------------------------------------------------------------------------------------------------------------------------------------|----------------------------------------------------------------------------------------------------------------------------------------------------------------------------------------------------------------------------------------------------------------------------------------------------------------------------------------------------------------------------------|
| <p><b>Bicellular tight junction assembly:</b> the aggregation, arrangement and bonding together of a set of components to form a tight junction, an occluding cell-cell junction that is composed of a branching network of sealing strands that completely encircles the apical end of each cell in an epithelial sheet.</p>         | <p>PECAM1; ARL2; CLDN5; WNT11; CLDN3; APC; CLDN6; CLDN22; SLC39A9; OCLN; OCEL1; CLDN34; CLDN11; PAK2; CLDN23; CLDN16; CLDN14; ESAM; CLDN2; MARVELD3; CLDN1; CLDN9; CLDN7; RAB13; CLDN10; ECT2; DLG1; CLDN4; CDH5; CLDN25; CLDN19; MARVELD2; AFDN; SRF; CLDN24; STRN; MPP7; RAMP2; MICALL2; GRHL2; TBCD; POF1B; CLDN20; CLDN18; CLDN17; CLDN8; CLDN15; FRMPD2; PARD3, PDCD6IP</p> |
| <p><b>Apical junction assembly:</b> the formation of an apical junction, a functional unit located near the cell apex at the points of contact between epithelial cells composed of tight junction, zonula adherens junction and desmosomes, by the aggregation, arrangement and bonding together of its constituents.</p>            | <p>FBF1; RHOA; CTNNA1; WDR1; PKN2; RHOC; VCL</p>                                                                                                                                                                                                                                                                                                                                 |
| <p><b>Cell-cell junction assembly:</b> the aggregation, arrangement and bonding together of a set of components to form a junction between cells.</p>                                                                                                                                                                                 | <p>CLDN5; TRPV4; CDH24; CDH18; GJA4; CDH9; FSCN1; FLCN; TLN1; CDH19; CDH22; CDH10; TLN2; CDH17; DSG1; CDH7; CDH5; LIM2; CDH3; CDH2; TJP1; CDH4; NR1H4; CDH26; CDH20; GJC1; PKP4; HDAC7; CDH1; CDH15; CDH13; CDH12; CDH11; CDH8; CDH6; PARD6B</p>                                                                                                                                 |
| <p><b>Tight junction assembly:</b> a cellular process that results in the aggregation, arrangement and bonding together of a set of components to form a tight junction. A tight junction seals cells together in an epithelium in a way that prevents even small molecules from leaking from one side of the sheet to the other.</p> | <p>CLDN5; CLDN11; PATJ; MPDZ; EPHB2; CLDN12 CDHR3; ACTG1</p>                                                                                                                                                                                                                                                                                                                     |
| <p><b>Adherens junction assembly:</b> the aggregation, arrangement and bonding together of a set of components to form an adherens junction. An adherens junction is a cell-cell junction composed</p>                                                                                                                                | <p>FER; HIPK1; PIP5K1C; CTNNB1; SMAD7; ZNF703, PAK2; ACTB; RAMP2; TBCD; VCL; JAM3</p>                                                                                                                                                                                                                                                                                            |

|                                                                                                                                                                                                                                                                                                                                                                                                                                                                                            |                                                  |
|--------------------------------------------------------------------------------------------------------------------------------------------------------------------------------------------------------------------------------------------------------------------------------------------------------------------------------------------------------------------------------------------------------------------------------------------------------------------------------------------|--------------------------------------------------|
| of the epithelial cadherin-catenin complex at which the cytoplasmic face of the plasma membrane is attached to actin filaments.                                                                                                                                                                                                                                                                                                                                                            |                                                  |
| <b>Tricellular tight junction assembly:</b> the aggregation, arrangement and bonding together of a set of components to form a tricellular tight junction                                                                                                                                                                                                                                                                                                                                  | LSR; ILDR1                                       |
| <b>Desmosome assembly:</b> a cellular process that results in the aggregation, arrangement and bonding together of a set of components to form a desmosome. A desmosome is a patch-like intercellular junction found in vertebrate tissues, consisting of parallel zones of 2 cell membranes, separated by a space of 25-35 nm, and having dense fibrillar plaques in subjacent cytoplasm. Desmosomes link two cells together; hemidesmosomes attach one cell to the extracellular matrix. | PKP2; PKP3; PRKCA; JUP                           |
| <b>Gap junction assembly:</b> assembly of gap junctions which serve as direct connections between the cytoplasms of adjacent cells. They provide open channels through the plasma membrane, allowing ions and small molecules (less than approximately a thousand daltons) to diffuse freely between neighboring cells, but preventing the passage of proteins and nucleic acids.                                                                                                          | CTNNA1; GJB6; GJA1; GJD3; GJB1; GJB2; GJC1; GJA5 |
| <b>Filtration diaphragm assembly:</b> the aggregation, arrangement and bonding together of a set of components to form a filtration diaphragm, a specialized cell-cell junction found between the cells of the excretory system, which provides a barrier for filtration of blood or hemolymph.                                                                                                                                                                                            | FKRP                                             |
| <b>Slit diaphragm assembly:</b> The aggregation, arrangement and bonding together of a set of components to form a slit diaphragm, specialized cell-cell junction found between interdigitating foot processes of glomerular epithelium (the podocytes) in the vertebrate kidney, which is adapted for facilitating glomerular filtration.                                                                                                                                                 | PTPRO; NPHS1                                     |
| <b>Paranodal junction assembly:</b> Formation of the junction between an axon and the glial cell that forms the myelin sheath. Paranodal junctions form at each paranode, i.e. at the ends of the unmyelinated nodes of Ranvier.                                                                                                                                                                                                                                                           | EPB41L3; CNTNAP1; GNPAT; UGT8; CD9; ANK2         |
| <b>Zonula adherens assembly:</b> Assembly of the zonula adherens, a cell-cell adherens junction which forms a continuous belt near the apex of epithelial cells.                                                                                                                                                                                                                                                                                                                           | DLG5                                             |

\*Adapted from <https://amigo.geneontology.org/amigo/term/GO:0007043>; \*\*The same gene can be present in multiple classes

**Supplementary Table 2. Genes excluded from analysis due to being overall expressed in less than 70% of foreskins from participant individuals.**

| Gene           | n/N (%) expressing gene overall<br>N=139 | n/N (%) expressing gene, South Africa<br>N=68 | n/N (%) expressing gene, Uganda<br>N=71 | p-value <sup>1</sup> |
|----------------|------------------------------------------|-----------------------------------------------|-----------------------------------------|----------------------|
| <i>CLDN18</i>  | 1 (0.7%)                                 | 1 (1.5%)                                      | 0 (0%)                                  | 0.49                 |
| <i>LIM2</i>    | 1 (0.7%)                                 | 1 (1.5%)                                      | 0 (0%)                                  | 0.49                 |
| <i>CLDN24</i>  | 4 (2.9%)                                 | 1 (1.5%)                                      | 3 (4.2%)                                | 0.62                 |
| <i>CLDN2</i>   | 5 (3.6%)                                 | 3 (4.4%)                                      | 2 (2.8%)                                | 0.68                 |
| <i>CLDN20</i>  | 6 (4.3%)                                 | 6 (8.8%)                                      | 0 (0%)                                  | 0.01                 |
| <i>CLDN14</i>  | 15 (10.8%)                               | 10 (14.7%)                                    | 5 (7.0%)                                | 0.18                 |
| <i>FRMPD2</i>  | 17 (12.2%)                               | 8 (11.8%)                                     | 9 (12.7%)                               | 1.00                 |
| <i>IGSF5</i>   | 18 (12.9%)                               | 12 (17.6%)                                    | 6 (8.5%)                                | 0.13                 |
| <i>C1QTNF5</i> | 19 (13.7%)                               | 11 (16.2%)                                    | 8 (11.3%)                               | 0.46                 |
| <i>CLDN22</i>  | 20 (14.4%)                               | 10 (14.7%)                                    | 10 (14.1%)                              | 1.00                 |
| <i>CLDN25</i>  | 35 (25.2%)                               | 16 (23.5%)                                    | 19 (26.8%)                              | 0.70                 |
| <i>CLDN6</i>   | 61 (43.9%)                               | 29 (42.6%)                                    | 32 (45.1%)                              | 0.89                 |
| <i>CLDN9</i>   | 63 (45.3%)                               | 37 (54.4%)                                    | 26 (36.6%)                              | 0.04                 |
| <i>ILDR2</i>   | 93 (66.9%)                               | 48 (70.6%)                                    | 45 (63.3%)                              | 0.38                 |

<sup>1</sup>P-value for comparison of proportions expressing gene between South Africa and Uganda participants, generated using Fisher's exact test.

**Supplementary Table 3. Effect of oral PrEP on tight junction gene expression, all participants.**

| <b>Gene</b>      | <b>PrEP = None</b> | <b>PrEP = FTC-TDF</b> | <b>PrEP = FTC-TAF</b> |
|------------------|--------------------|-----------------------|-----------------------|
| <i>TRAF4</i>     | 3108 (2777, 3486)  | 3014 (2423, 3504)     | 2864 (2269, 3442)     |
| <i>RAP2B</i>     | 3211 (917, 3396)   | 2929 (1312, 3325)     | 2916 (650, 3411)      |
| <i>CCND1</i>     | 2960 (2502, 3516)  | 2699 (1797, 3108)     | 3094 (1863, 3401)     |
| <i>NPHP4</i>     | 3131 (967, 3362)   | 2734 (485, 3321)      | 2945 (1557, 3606)     |
| <i>TJAP1</i>     | 3287 (3110, 3506)  | 2857 (2138, 3422)     | 2680 (926, 3287)      |
| <i>ACTB</i>      | 2824 (2636, 3284)  | 2817 (2182, 3436)     | 2950 (2560, 3435)     |
| <i>CRB3</i>      | 2876 (2658, 3186)  | 2872 (2236, 3443)     | 2839 (2555, 3601)     |
| <i>PRKCZ</i>     | 3281 (354, 3523)   | 2699 (330, 3189)      | 2997 (393, 3376)      |
| <i>CDH5</i>      | 3073 (2660, 3461)  | 2632 (2081, 3205)     | 2970 (2444, 3480)     |
| <i>ATP7B</i>     | 2834 (2491, 3235)  | 2775 (2125, 3611)     | 2786 (2188, 3355)     |
| <i>NPHP1</i>     | 2992 (2555, 3155)  | 2786 (2205, 3447)     | 2765 (2182, 3505)     |
| <i>RAPGEF2</i>   | 2576 (2357, 3040)  | 2840 (2222, 3502)     | 2885 (2408, 3397)     |
| <i>CGNL1</i>     | 2941 (1720, 3225)  | 2748 (2107, 3210)     | 2766 (2108, 3213)     |
| <i>ARHGEF2</i>   | 3059 (2826, 3174)  | 2680 (2159, 3210)     | 2687 (2163, 3303)     |
| <i>RPGRIP1L</i>  | 2691 (2212, 3153)  | 2790 (2342, 3312)     | 2687 (569, 3128)      |
| <i>MICALL2</i>   | 2886 (593, 3206)   | 2716 (1588, 3265)     | 2651 (1737, 3322)     |
| <i>CLDN4</i>     | 2519 (2184, 2909)  | 2699 (2228, 3133)     | 2731 (2192, 3384)     |
| <i>FZD5</i>      | 2851 (2320, 3460)  | 2724 (2051, 3179)     | 2611 (1908, 3309)     |
| <i>TJP2</i>      | 2976 (2185, 3276)  | 2790 (1449, 3393)     | 2488 (1686, 3186)     |
| <i>CLDN5</i>     | 2879 (2116, 3406)  | 2592 (1899, 3085)     | 2627 (1505, 3037)     |
| <i>CLDN1</i>     | 2524 (1908, 2940)  | 2653 (2236, 3273)     | 2674 (2122, 3289)     |
| <i>ILDR1</i>     | 2766 (2312, 3071)  | 2633 (1990, 3172)     | 2534 (2009, 3344)     |
| <i>APC</i>       | 2635 (2080, 2932)  | 2535 (2044, 3326)     | 2694 (2106, 3222)     |
| <i>POF1B</i>     | 2320 (1222, 3123)  | 2753 (1982, 3350)     | 2531 (2141, 3432)     |
| <i>PRKCI</i>     | 2385 (808, 2949)   | 2489 (1971, 3380)     | 2884 (2239, 3379)     |
| <i>ESAM</i>      | 2669 (2275, 2877)  | 2462 (2000, 3287)     | 2560 (2095, 3270)     |
| <i>EPB41L4B</i>  | 2483 (2120, 2929)  | 2511 (1996, 3027)     | 2629 (2048, 3286)     |
| <i>SHROOM2</i>   | 2590 (2307, 3152)  | 2389 (1919, 3176)     | 2800 (2084, 3372)     |
| <i>JAM3</i>      | 2523 (2160, 2916)  | 2364 (1886, 3300)     | 2581 (1955, 3164)     |
| <i>TJP3</i>      | 2445 (2003, 2873)  | 2480 (2103, 2973)     | 2454 (2036, 2860)     |
| <i>CXADR</i>     | 2721 (669, 3138)   | 2388 (546, 2999)      | 2291 (402, 2960)      |
| <i>CTNNB1</i>    | 2281 (2050, 2562)  | 2458 (1953, 3026)     | 2476 (2021, 3007)     |
| <i>RAP2C</i>     | 2346 (1918, 3159)  | 2414 (1801, 3172)     | 2409 (1897, 3034)     |
| <i>PARD6A</i>    | 2448 (2136, 2759)  | 2190 (1845, 3011)     | 2288 (1784, 2853)     |
| <i>OCLN</i>      | 2130 (1647, 2710)  | 2323 (1696, 2739)     | 2380 (1906, 2775)     |
| <i>ADCYAP1R1</i> | 2758 (2125, 3303)  | 2206 (1129, 2959)     | 2292 (1342, 2891)     |
| <i>JAM2</i>      | 2415 (1839, 2575)  | 2057 (1704, 2806)     | 2270 (1830, 2691)     |
| <i>USP53</i>     | 2208 (1692, 3245)  | 2161 (1726, 3320)     | 2345 (1904, 2943)     |
| <i>PLXDC1</i>    | 2415 (1788, 3065)  | 2210 (1648, 2720)     | 2320 (1740, 2886)     |
| <i>PDCD6IP</i>   | 2136 (1720, 2344)  | 2169 (1640, 2789)     | 2227 (1767, 2768)     |
| <i>CCDC85C</i>   | 2119 (1989, 2342)  | 2213 (1723, 2726)     | 2273 (1773, 2632)     |
| <i>SAPCD2</i>    | 2506 (2166, 2943)  | 2053 (1443, 2521)     | 2185 (1635, 2929)     |
| <i>LIN7C</i>     | 2217 (1932, 2650)  | 2219 (1711, 2872)     | 2169 (1716, 2899)     |
| <i>BVES</i>      | 2218 (1299, 2515)  | 2084 (1159, 2681)     | 2209 (1433, 2819)     |
| <i>PARD3</i>     | 2186 (1749, 2521)  | 2169 (1714, 2447)     | 2080 (1761, 2608)     |
| <i>EPCAM</i>     | 2342 (1495, 2762)  | 2341 (659, 3119)      | 1841 (618, 2791)      |
| <i>PARD3B</i>    | 2037 (1456, 2310)  | 1971 (1455, 2792)     | 2119 (1730, 2638)     |
| <i>EPHA2</i>     | 2249 (1131, 2906)  | 1882 (1354, 2547)     | 2140 (1339, 2709)     |
| <i>CLDN10</i>    | 1161 (740, 2988)   | 2267 (1055, 3131)     | 1983 (690, 2880)      |
| <i>RIGI</i>      | 1847 (1420, 2239)  | 1993 (1137, 2687)     | 1854 (1053, 2695)     |
| <i>CLDN17</i>    | 2794 (1103, 3237)  | 1726 (607, 2514)      | 1838 (854, 2695)      |
| <i>MXRA8</i>     | 2702 (674, 3483)   | 1555 (492, 2968)      | 1755 (472, 2940)      |

|                 |                   |                   |                   |
|-----------------|-------------------|-------------------|-------------------|
| <i>WNK4</i>     | 1221 (338, 2548)  | 1931 (385, 2663)  | 2046 (869, 2752)  |
| <i>TGFBR1</i>   | 2004 (1370, 2507) | 1826 (1428, 2691) | 1878 (1550, 2564) |
| <i>F11R</i>     | 1665 (1481, 2007) | 1821 (1343, 2415) | 1937 (1529, 2449) |
| <i>VAPA</i>     | 1827 (1294, 2148) | 1632 (1221, 2411) | 1867 (1417, 2328) |
| <i>AOC1</i>     | 1698 (1093, 2669) | 1466 (716, 2851)  | 2058 (1094, 3014) |
| <i>CLDN19</i>   | 2588 (663, 3274)  | 2035 (676, 2934)  | 1145 (328, 2807)  |
| <i>RAB13</i>    | 1836 (1651, 1947) | 1776 (1290, 2426) | 1754 (1337, 2253) |
| <i>AMOT</i>     | 1843 (1264, 2120) | 1710 (1124, 2393) | 1800 (1231, 2453) |
| <i>PALS1</i>    | 1748 (1307, 2346) | 1687 (1169, 2559) | 1801 (1352, 2352) |
| <i>AMOTL1</i>   | 1626 (1380, 2179) | 1688 (1312, 2357) | 1757 (1523, 2291) |
| <i>CLDN12</i>   | 1646 (743, 2490)  | 1700 (897, 2409)  | 1628 (1212, 2505) |
| <i>MARVELD2</i> | 1637 (1323, 1927) | 1553 (1143, 2207) | 1725 (1300, 2174) |
| <i>PARD6B</i>   | 2246 (927, 3148)  | 1843 (518, 3123)  | 1436 (354, 2993)  |
| <i>CLDN16</i>   | 1747 (846, 2713)  | 1644 (953, 2297)  | 1597 (842, 2315)  |
| <i>CLDN15</i>   | 1663 (1494, 1975) | 1655 (1128, 2511) | 1568 (1027, 2309) |
| <i>SYMPK</i>    | 1674 (1410, 1837) | 1568 (1245, 2264) | 1587 (1263, 2113) |
| <i>PARD6G</i>   | 1527 (1206, 1774) | 1612 (1134, 2077) | 1590 (1263, 2236) |
| <i>CLDN11</i>   | 1445 (752, 2698)  | 1550 (758, 2839)  | 1630 (684, 2498)  |
| <i>LIN7B</i>    | 1636 (1383, 2103) | 1561 (1266, 2011) | 1510 (1053, 2141) |
| <i>CLDN8</i>    | 1749 (521, 2963)  | 1540 (608, 2753)  | 1601 (473, 2808)  |
| <i>CLDN23</i>   | 1491 (1204, 2567) | 1328 (767, 1983)  | 1674 (765, 2369)  |
| <i>AFDN</i>     | 1583 (911, 2140)  | 1528 (1035, 1992) | 1546 (1111, 2055) |
| <i>MAGI2</i>    | 844 (287, 3204)   | 1039 (398, 2970)  | 2338 (422, 3233)  |
| <i>CLDN7</i>    | 1394 (415, 1990)  | 1422 (641, 2854)  | 1480 (511, 2376)  |
| <i>LSR</i>      | 1560 (1179, 1965) | 1415 (1088, 2013) | 1463 (1244, 2143) |
| <i>CYTH2</i>    | 1457 (1039, 1648) | 1404 (973, 1850)  | 1348 (1061, 1994) |
| <i>VASP</i>     | 1306 (1049, 1704) | 1310 (964, 1839)  | 1486 (1141, 1877) |
| <i>PMP22</i>    | 1106 (437, 1522)  | 1359 (785, 1766)  | 1414 (942, 1926)  |
| <i>LIN7A</i>    | 1295 (173, 2314)  | 1681 (523, 2898)  | 1211 (413, 2686)  |
| <i>ECT2</i>     | 1269 (393, 2127)  | 1409 (548, 2092)  | 1325 (790, 2010)  |
| <i>EPPK1</i>    | 982 (717, 2151)   | 1571 (594, 2808)  | 1312 (569, 2138)  |
| <i>CNTNAP1</i>  | 1295 (768, 1665)  | 1343 (800, 2046)  | 1255 (810, 2084)  |
| <i>CYTH1</i>    | 1327 (1055, 1514) | 1368 (919, 1714)  | 1264 (962, 1900)  |
| <i>WNK3</i>     | 972 (413, 1889)   | 1644 (556, 2842)  | 1281 (420, 2641)  |
| <i>CLMP</i>     | 1212 (765, 1759)  | 1286 (625, 2106)  | 1239 (620, 1847)  |
| <i>MTDH</i>     | 1289 (721, 1545)  | 1200 (744, 1791)  | 1247 (850, 1740)  |
| <i>JAML</i>     | 1201 (1088, 1673) | 1334 (715, 1927)  | 1236 (653, 1999)  |
| <i>MAPK15</i>   | 887 (387, 2858)   | 1188 (362, 2896)  | 1489 (532, 2770)  |
| <i>SH3BP1</i>   | 455 (171, 3286)   | 1153 (256, 3157)  | 1951 (519, 3118)  |
| <i>MPDZ</i>     | 1138 (571, 1429)  | 1299 (833, 1984)  | 1184 (879, 1698)  |
| <i>TBCD</i>     | 1272 (906, 1478)  | 1202 (908, 1695)  | 1170 (932, 1642)  |
| <i>TJP1</i>     | 1080 (680, 1861)  | 1141 (759, 1776)  | 1266 (854, 1756)  |
| <i>OCEL1</i>    | 1175 (888, 1465)  | 1072 (794, 1714)  | 1198 (758, 2001)  |
| <i>CLDN3</i>    | 467 (1, 2103)     | 916 (2, 2732)     | 1210 (151, 2407)  |
| <i>ASH1L</i>    | 1966 (251, 3395)  | 1104 (295, 3091)  | 1048 (329, 3228)  |
| <i>MAGI3</i>    | 1147 (677, 1560)  | 957 (548, 1725)   | 1181 (601, 1618)  |
| <i>CGN</i>      | 941 (554, 1353)   | 1036 (668, 1543)  | 1078 (674, 1484)  |
| <i>GJA1</i>     | 579 (188, 1671)   | 929 (497, 1560)   | 946 (503, 1475)   |
| <i>STRN</i>     | 2132 (757, 3230)  | 1151 (472, 2894)  | 692 (325, 2633)   |
| <i>MPP7</i>     | 1020 (471, 2114)  | 871 (463, 1601)   | 853 (418, 1362)   |
| <i>SYNPO</i>    | 805 (463, 1219)   | 958 (575, 1729)   | 823 (539, 1516)   |
| <i>CDK4</i>     | 863 (502, 1059)   | 863 (569, 1312)   | 941 (651, 1310)   |
| <i>DLG1</i>     | 949 (363, 2152)   | 854 (408, 1581)   | 738 (421, 1351)   |
| <i>ANK3</i>     | 547 (173, 1480)   | 806 (368, 2801)   | 962 (455, 3078)   |

|                 |                  |                 |                  |
|-----------------|------------------|-----------------|------------------|
| <i>SIPA1L3</i>  | 700 (557, 883)   | 885 (506, 1369) | 785 (398, 1526)  |
| <i>MARVELD3</i> | 722 (242, 996)   | 692 (314, 1890) | 1018 (300, 2023) |
| <i>FRMD4B</i>   | 1244 (567, 3328) | 738 (322, 1692) | 728 (340, 1583)  |
| <i>MAGI1</i>    | 706 (274, 3323)  | 515 (224, 2828) | 909 (353, 3247)  |
| <i>PATJ</i>     | 417 (205, 2613)  | 884 (431, 2922) | 682 (226, 2865)  |
| <i>NFASC</i>    | 923 (470, 3193)  | 637 (308, 2574) | 734 (361, 3010)  |
| <i>FRMD4A</i>   | 667 (335, 3474)  | 633 (197, 2612) | 911 (326, 2956)  |
| <i>AMOTL2</i>   | 392 (287, 792)   | 705 (353, 1426) | 819 (439, 1569)  |
| <i>UBN1</i>     | 501 (248, 3188)  | 491 (152, 2544) | 719 (278, 2877)  |
| <i>CYTH3</i>    | 522 (370, 736)   | 662 (387, 1125) | 651 (490, 1060)  |
| <i>DLG3</i>     | 469 (190, 901)   | 546 (296, 1787) | 690 (298, 1082)  |
| <i>ARHGAP17</i> | 539 (362, 751)   | 588 (330, 1392) | 582 (338, 1150)  |

Figures show median expression (with interquartile range in parentheses) by trial arm. Results are ordered by median expression level (high to low) among all participants. P-values (not shown) for differences between trial arms were calculated from Kruskal-Wallis test and adjusted for multiple testing using the false discovery rate (FDR), all FDR-adjusted p-values were >0.5.

**Supplementary Table 4. Effect of oral PrEP on tight junction gene expression, South Africa participants.**

| Gene             | PrEP = None       | PrEP = FTC-TDF    | PrEP = FTC-TAF    |
|------------------|-------------------|-------------------|-------------------|
| <i>CRB3</i>      | 2864 (2555, 3208) | 2939 (1996, 3580) | 3319 (2484, 3796) |
| <i>ATP7B</i>     | 2878 (2491, 3235) | 3085 (2071, 3902) | 2934 (2172, 3525) |
| <i>JAM3</i>      | 2442 (2160, 3034) | 2701 (1780, 3509) | 3030 (2156, 3405) |
| <i>ACTB</i>      | 3029 (2796, 3284) | 2763 (2095, 3787) | 3021 (2231, 3651) |
| <i>ESAM</i>      | 2666 (2363, 2980) | 2912 (2047, 3758) | 3136 (2167, 3393) |
| <i>CCND1</i>     | 3078 (2719, 3579) | 2604 (580, 3005)  | 3175 (1949, 3459) |
| <i>RAPGEF2</i>   | 2416 (2272, 2607) | 2840 (2105, 3616) | 2993 (2364, 3584) |
| <i>CGNL1</i>     | 2451 (1534, 3424) | 2748 (1713, 3171) | 2986 (1929, 3328) |
| <i>TRAF4</i>     | 3011 (2777, 3153) | 2782 (2288, 3841) | 2792 (474, 3429)  |
| <i>SHROOM2</i>   | 2729 (2299, 3152) | 2445 (1977, 3552) | 3132 (2341, 3943) |
| <i>NPHP1</i>     | 2985 (2459, 3071) | 2711 (1711, 3676) | 2902 (1984, 3636) |
| <i>CDH5</i>      | 2820 (2574, 3330) | 2362 (549, 3359)  | 3371 (1765, 3555) |
| <i>NPHP4</i>     | 2747 (895, 3317)  | 2734 (707, 3392)  | 3240 (511, 3812)  |
| <i>PAR6A</i>     | 2706 (2372, 2950) | 2727 (2059, 3486) | 2770 (2206, 3631) |
| <i>ARHGEF2</i>   | 3019 (2932, 3501) | 2621 (1049, 3269) | 2910 (547, 3901)  |
| <i>TJAP1</i>     | 3313 (3208, 3533) | 2524 (326, 3007)  | 2428 (254, 3455)  |
| <i>APC</i>       | 2173 (2011, 2893) | 2535 (1930, 3401) | 2965 (2278, 3458) |
| <i>ILDR1</i>     | 2641 (2328, 2823) | 2518 (1587, 3272) | 2873 (2056, 3798) |
| <i>RAP2B</i>     | 3225 (3142, 3396) | 2462 (673, 3055)  | 2013 (450, 3348)  |
| <i>RPGRIP1L</i>  | 2950 (2351, 3153) | 2766 (1840, 3799) | 2377 (346, 3446)  |
| <i>LIN7C</i>     | 2289 (1984, 2780) | 2526 (1673, 2939) | 2818 (1983, 3223) |
| <i>TJP2</i>      | 2976 (2530, 3060) | 2593 (1488, 3602) | 2653 (2020, 3197) |
| <i>CLDN5</i>     | 3021 (2186, 3406) | 2415 (1577, 3287) | 2748 (571, 3238)  |
| <i>CLDN1</i>     | 2666 (2058, 3199) | 2486 (2046, 3331) | 2835 (2192, 3405) |
| <i>CLDN4</i>     | 2214 (1909, 2687) | 2700 (1926, 3322) | 2654 (1931, 3398) |
| <i>EPB41L4B</i>  | 2483 (1922, 2597) | 2361 (1755, 3163) | 2777 (2022, 3405) |
| <i>RAP2C</i>     | 2282 (1909, 3307) | 2767 (1735, 3286) | 2663 (1971, 3242) |
| <i>POF1B</i>     | 2237 (462, 2555)  | 2556 (1821, 3350) | 2874 (2107, 3507) |
| <i>CTNNB1</i>    | 2206 (2006, 2368) | 2148 (1839, 3332) | 2854 (2118, 3141) |
| <i>PLXDC1</i>    | 2185 (1547, 3031) | 2336 (1705, 2821) | 2642 (1781, 3279) |
| <i>USP53</i>     | 1797 (1627, 3300) | 2463 (1598, 3416) | 2632 (2082, 3281) |
| <i>FZD5</i>      | 2536 (1312, 3180) | 2343 (1634, 3298) | 2678 (1466, 3454) |
| <i>PRKCI</i>     | 2370 (335, 2484)  | 2489 (2170, 3515) | 2869 (2114, 3506) |
| <i>TJP3</i>      | 2435 (1692, 2842) | 2367 (1716, 3070) | 2709 (1952, 3210) |
| <i>JAM2</i>      | 2415 (1613, 2538) | 2430 (1748, 3232) | 2489 (1973, 2889) |
| <i>ADCYAP1R1</i> | 2758 (2448, 3238) | 2206 (955, 3098)  | 2135 (866, 3152)  |
| <i>CCDC85C</i>   | 2153 (1974, 2719) | 2265 (1450, 3021) | 2522 (1833, 2760) |
| <i>SAPCD2</i>    | 2654 (2260, 3374) | 2198 (1141, 2795) | 2905 (2007, 3499) |
| <i>CXADR</i>     | 2567 (753, 2988)  | 2458 (1187, 3175) | 1855 (328, 2942)  |
| <i>OCLN</i>      | 1811 (1648, 2451) | 2239 (1437, 2994) | 2422 (1856, 3224) |
| <i>PDCD6IP</i>   | 1780 (1644, 2344) | 2169 (1540, 3043) | 2390 (1885, 2920) |
| <i>BVES</i>      | 2218 (1618, 2412) | 2131 (1159, 3190) | 2182 (1108, 2964) |
| <i>PAR6B</i>     | 2647 (1422, 3296) | 2352 (563, 3338)  | 1635 (314, 2913)  |
| <i>CLDN10</i>    | 2088 (921, 3314)  | 2352 (726, 3152)  | 1737 (595, 3127)  |
| <i>TGFBR1</i>    | 2076 (1554, 2507) | 2094 (1219, 2875) | 2288 (1701, 2869) |
| <i>PAR3B</i>     | 2037 (1285, 2163) | 1984 (1425, 2876) | 2299 (1892, 2891) |
| <i>PAR3</i>      | 1855 (1248, 2360) | 1969 (1563, 2448) | 2083 (1777, 2595) |
| <i>AOC1</i>      | 1698 (1197, 2855) | 1793 (1042, 3238) | 2527 (1693, 3356) |
| <i>F11R</i>      | 1486 (1311, 1828) | 2051 (1289, 2481) | 2410 (1558, 2795) |
| <i>VAPA</i>      | 1563 (1174, 2088) | 2107 (1015, 2473) | 2023 (1472, 2404) |

|                 |                   |                   |                   |
|-----------------|-------------------|-------------------|-------------------|
| <i>CLDN15</i>   | 1933 (1554, 2218) | 1737 (1263, 2638) | 2162 (1547, 2365) |
| <i>MICALL2</i>  | 599 (257, 2480)   | 2165 (434, 3002)  | 2170 (455, 3389)  |
| <i>LSR</i>      | 1606 (1247, 2024) | 1958 (865, 2331)  | 1987 (1555, 2452) |
| <i>RIGI</i>     | 1633 (1420, 2446) | 1602 (1034, 2687) | 2182 (1090, 2786) |
| <i>RAB13</i>    | 1694 (1535, 1872) | 2348 (1147, 2724) | 1955 (1663, 2941) |
| <i>LIN7B</i>    | 1954 (1609, 2192) | 1765 (1266, 2269) | 1934 (1350, 2240) |
| <i>EPHA2</i>    | 2154 (1279, 3030) | 1822 (1195, 2923) | 2127 (1455, 2929) |
| <i>CNTNAP1</i>  | 1423 (852, 1840)  | 1948 (1287, 2696) | 1914 (1331, 2802) |
| <i>SYMPK</i>    | 1701 (1430, 1864) | 1661 (1228, 2376) | 1993 (1521, 2344) |
| <i>CLDN16</i>   | 2252 (1648, 2913) | 1644 (934, 2159)  | 1974 (907, 2713)  |
| <i>PALS1</i>    | 1467 (1307, 2468) | 1719 (1134, 2536) | 1833 (1341, 2433) |
| <i>WNK4</i>     | 1221 (338, 2856)  | 1998 (474, 2517)  | 2018 (793, 2813)  |
| <i>AMOTL1</i>   | 1406 (1175, 1760) | 1608 (1061, 2483) | 2139 (1514, 2426) |
| <i>CLDN17</i>   | 1981 (375, 3151)  | 1699 (465, 2398)  | 2165 (1273, 2846) |
| <i>CLDN12</i>   | 1259 (547, 2598)  | 1719 (838, 2567)  | 1764 (1354, 2640) |
| <i>CLDN11</i>   | 1816 (802, 3153)  | 1480 (805, 2531)  | 1834 (740, 2501)  |
| <i>AMOT</i>     | 1606 (1159, 2001) | 1744 (1124, 2220) | 1743 (1116, 2422) |
| <i>AFDN</i>     | 1530 (986, 2181)  | 1613 (840, 2350)  | 1900 (1089, 2228) |
| <i>CLDN19</i>   | 2519 (72, 3274)   | 1856 (622, 2936)  | 1262 (366, 2762)  |
| <i>VASP</i>     | 1533 (1047, 1932) | 1665 (929, 2136)  | 1763 (1461, 2269) |
| <i>EPCAM</i>    | 2342 (887, 3004)  | 1853 (439, 2914)  | 1560 (670, 2511)  |
| <i>CLDN8</i>    | 2869 (662, 3245)  | 1540 (548, 2544)  | 2032 (612, 3055)  |
| <i>CYTH2</i>    | 1325 (1039, 1697) | 1528 (957, 2045)  | 1796 (1212, 2265) |
| <i>MARVELD2</i> | 1511 (1144, 1807) | 1442 (1049, 2207) | 1900 (1346, 2190) |
| <i>OCEL1</i>    | 1436 (706, 1777)  | 1341 (891, 2007)  | 1922 (1221, 2247) |
| <i>PMP22</i>    | 881 (437, 1568)   | 1682 (947, 2181)  | 1727 (1195, 2153) |
| <i>JAML</i>     | 1660 (1302, 2354) | 1344 (837, 2367)  | 1796 (1135, 2537) |
| <i>PARD6G</i>   | 1496 (1259, 1717) | 1552 (932, 2198)  | 1783 (1372, 2346) |
| <i>CLDN23</i>   | 1209 (574, 2078)  | 1328 (910, 1983)  | 1702 (769, 2439)  |
| <i>CLMP</i>     | 1192 (538, 1753)  | 1536 (831, 2607)  | 1595 (1049, 2039) |
| <i>CYTH1</i>    | 1228 (949, 1512)  | 1382 (868, 1950)  | 1662 (994, 2026)  |
| <i>PRKCZ</i>    | 3171 (354, 3399)  | 804 (314, 2839)   | 1161 (323, 3398)  |
| <i>ECT2</i>     | 692 (150, 2043)   | 1563 (911, 2271)  | 1314 (767, 2050)  |
| <i>EPPK1</i>    | 1353 (736, 3052)  | 1417 (412, 2732)  | 1518 (584, 2119)  |
| <i>MPDZ</i>     | 1175 (654, 1429)  | 1590 (731, 2080)  | 1455 (1018, 2003) |
| <i>TBCD</i>     | 1350 (750, 1478)  | 1445 (824, 1884)  | 1528 (1142, 1944) |
| <i>CLDN7</i>    | 1043 (415, 1990)  | 1722 (713, 2723)  | 1121 (440, 2185)  |
| <i>LIN7A</i>    | 738 (37, 1525)    | 1681 (996, 2648)  | 1334 (553, 2544)  |
| <i>TJP1</i>     | 877 (680, 1857)   | 1265 (563, 1782)  | 1350 (835, 1920)  |
| <i>MAGI2</i>    | 728 (202, 2988)   | 1032 (398, 2665)  | 2371 (623, 3364)  |
| <i>MTDH</i>     | 784 (721, 1545)   | 1569 (668, 1791)  | 1285 (856, 1812)  |
| <i>MAGI3</i>    | 1036 (204, 1540)  | 1145 (548, 1929)  | 1336 (774, 1755)  |
| <i>SYNPO</i>    | 721 (435, 1192)   | 1370 (744, 2180)  | 1472 (749, 1773)  |
| <i>CLDN3</i>    | 1453 (1, 3491)    | 1209 (2, 3050)    | 1224 (221, 2359)  |
| <i>MAGI1</i>    | 2800 (460, 3485)  | 1202 (273, 2934)  | 1161 (381, 3360)  |
| <i>STRN</i>     | 2982 (1044, 3291) | 883 (448, 2750)   | 1005 (373, 2892)  |
| <i>WNK3</i>     | 861 (70, 1657)    | 1532 (556, 2603)  | 1145 (398, 2501)  |
| <i>MXRA8</i>    | 2992 (891, 3441)  | 1039 (418, 2210)  | 1145 (435, 2499)  |
| <i>ASH1L</i>    | 3214 (260, 3479)  | 1297 (501, 2942)  | 692 (273, 3242)   |
| <i>CDK4</i>     | 1015 (442, 1171)  | 863 (475, 1600)   | 1255 (753, 1582)  |
| <i>CGN</i>      | 836 (400, 1448)   | 1059 (327, 1760)  | 1131 (634, 1555)  |
| <i>GJA1</i>     | 343 (127, 1564)   | 1071 (497, 2388)  | 1195 (580, 1718)  |
| <i>MPP7</i>     | 775 (337, 1511)   | 1051 (668, 2429)  | 985 (584, 1427)   |
| <i>MAPK15</i>   | 887 (350, 2544)   | 715 (362, 2302)   | 1243 (548, 2957)  |



|                 |                  |                  |                  |
|-----------------|------------------|------------------|------------------|
| <i>AMOTL2</i>   | 334 (193, 519)   | 1070 (596, 1579) | 1138 (623, 1670) |
| <i>ARHGAP17</i> | 516 (362, 702)   | 972 (331, 1509)  | 950 (552, 1308)  |
| <i>FRMD4A</i>   | 903 (376, 3474)  | 700 (197, 1862)  | 985 (265, 1675)  |
| <i>SIPA1L3</i>  | 808 (499, 1085)  | 1041 (506, 1640) | 1075 (336, 1739) |
| <i>DLG1</i>     | 925 (238, 2856)  | 1059 (465, 1794) | 752 (446, 1684)  |
| <i>NFASC</i>    | 803 (393, 3319)  | 952 (360, 2610)  | 801 (483, 3020)  |
| <i>MARVELD3</i> | 823 (555, 1005)  | 548 (308, 1688)  | 1139 (750, 1754) |
| <i>ANK3</i>     | 573 (185, 3129)  | 945 (382, 2872)  | 841 (399, 3029)  |
| <i>PATJ</i>     | 1940 (339, 3396) | 1053 (441, 2850) | 726 (423, 2972)  |
| <i>FRMD4B</i>   | 2050 (567, 3385) | 855 (388, 2818)  | 732 (292, 2833)  |
| <i>DLG3</i>     | 514 (159, 2710)  | 957 (326, 2768)  | 776 (435, 1411)  |
| <i>CYTH3</i>    | 517 (148, 878)   | 907 (260, 1571)  | 863 (582, 1116)  |
| <i>UBN1</i>     | 1991 (330, 3336) | 655 (245, 2544)  | 786 (616, 2069)  |
| <i>SH3BP1</i>   | 455 (190, 2786)  | 765 (446, 2604)  | 783 (398, 1244)  |

Figures show median expression (with interquartile range in parentheses) by trial arm. Results are ordered by median expression level (high to low) among all South Africa participants. P-values (not shown) for differences between trial arms were calculated from Kruskal-Wallis test and adjusted for multiple testing using the false discovery rate (FDR), all FDR-adjusted p-values were >0.5.

**Supplementary Table 5. Effect of oral PrEP on tight junction gene expression, Uganda participants.**

| <b>Gene</b>      | <b>PrEP = None</b> | <b>PrEP = FTC-TDF</b> | <b>PrEP = FTC-TAF</b> |
|------------------|--------------------|-----------------------|-----------------------|
| <i>RAP2B</i>     | 2939 (178, 3565)   | 3186 (2683, 3396)     | 3162 (2573, 3420)     |
| <i>PRKCZ</i>     | 3464 (824, 3613)   | 3086 (377, 3445)      | 3135 (750, 3383)      |
| <i>TRAF4</i>     | 3297 (2773, 3546)  | 3053 (2850, 3277)     | 2877 (2483, 3536)     |
| <i>TJAP1</i>     | 3268 (2952, 3495)  | 3081 (2592, 3557)     | 2785 (2497, 3240)     |
| <i>SH3BP1</i>    | 1699 (136, 3286)   | 3057 (237, 3439)      | 2991 (2007, 3370)     |
| <i>NPHP4</i>     | 3183 (1127, 3582)  | 2825 (328, 3308)      | 2931 (2283, 3362)     |
| <i>CCND1</i>     | 2820 (1418, 3488)  | 2878 (2240, 3420)     | 3047 (1862, 3360)     |
| <i>MICALL2</i>   | 3126 (2875, 3332)  | 2984 (2471, 3356)     | 2701 (2275, 2981)     |
| <i>CDH5</i>      | 3296 (2712, 3581)  | 2784 (2437, 3126)     | 2854 (2500, 3183)     |
| <i>ACTB</i>      | 2664 (2561, 3175)  | 2852 (2410, 3244)     | 2887 (2634, 3223)     |
| <i>NPHP1</i>     | 3026 (2627, 3382)  | 2828 (2257, 3440)     | 2730 (2320, 3219)     |
| <i>CRB3</i>      | 2887 (2662, 3186)  | 2864 (2458, 3196)     | 2735 (2597, 3097)     |
| <i>FZD5</i>      | 3243 (2657, 3660)  | 2817 (2474, 3171)     | 2567 (1982, 3237)     |
| <i>RPGRIP1L</i>  | 2621 (940, 3151)   | 2861 (2436, 3253)     | 2731 (1962, 3072)     |
| <i>CGNL1</i>     | 2941 (2324, 3171)  | 2756 (2213, 3239)     | 2744 (2173, 3107)     |
| <i>RAPGEF2</i>   | 2961 (2482, 3327)  | 2825 (2414, 3154)     | 2755 (2412, 3343)     |
| <i>CLDN4</i>     | 2833 (2457, 2935)  | 2696 (2414, 3058)     | 2771 (2498, 3255)     |
| <i>ARHGEF2</i>   | 3062 (2633, 3132)  | 2903 (2526, 3139)     | 2665 (2475, 2944)     |
| <i>ATP7B</i>     | 2821 (2397, 3233)  | 2716 (2187, 3217)     | 2685 (2226, 3010)     |
| <i>MXRA8</i>     | 2642 (504, 3492)   | 2831 (541, 3363)      | 2554 (540, 3300)      |
| <i>CLDN1</i>     | 2462 (808, 2774)   | 2952 (2390, 3252)     | 2591 (2047, 3230)     |
| <i>PRKCI</i>     | 2850 (2145, 3197)  | 2484 (1835, 2947)     | 2910 (2247, 3336)     |
| <i>POF1B</i>     | 2620 (1930, 3316)  | 2766 (2389, 3366)     | 2383 (2139, 3233)     |
| <i>TJP2</i>      | 2855 (1134, 3445)  | 2854 (1097, 3294)     | 2433 (518, 3166)      |
| <i>CLDN5</i>     | 2720 (1971, 3477)  | 2596 (2110, 3041)     | 2594 (2097, 2899)     |
| <i>ILDR1</i>     | 2839 (2295, 3397)  | 2637 (2057, 3105)     | 2373 (1984, 2915)     |
| <i>APC</i>       | 2724 (2224, 2953)  | 2528 (2177, 3041)     | 2529 (2061, 2958)     |
| <i>CXADR</i>     | 2828 (618, 3278)   | 2267 (379, 2955)      | 2508 (1018, 2974)     |
| <i>EPB41L4B</i>  | 2567 (2123, 3123)  | 2535 (2223, 2912)     | 2357 (2052, 3045)     |
| <i>TJP3</i>      | 2480 (2116, 2873)  | 2505 (2246, 2950)     | 2438 (2220, 2778)     |
| <i>ESAM</i>      | 2710 (2267, 2877)  | 2417 (1967, 2761)     | 2430 (2041, 2610)     |
| <i>EPCAM</i>     | 2289 (1495, 2636)  | 2622 (1082, 3222)     | 2185 (503, 2935)      |
| <i>SHROOM2</i>   | 2462 (2307, 3221)  | 2339 (1897, 2873)     | 2255 (2011, 3059)     |
| <i>CTNNB1</i>    | 2362 (2166, 2780)  | 2469 (1967, 2873)     | 2198 (1954, 2822)     |
| <i>OCLN</i>      | 2443 (1419, 2879)  | 2328 (1960, 2715)     | 2314 (1957, 2667)     |
| <i>ADCYAP1R1</i> | 2661 (1550, 3303)  | 2206 (1454, 2943)     | 2330 (1556, 2781)     |
| <i>JAM3</i>      | 2549 (2132, 2718)  | 2135 (1950, 2775)     | 2280 (1913, 2692)     |
| <i>RAP2C</i>     | 2346 (1983, 2848)  | 2341 (1986, 3025)     | 2165 (1847, 2786)     |
| <i>PARD3</i>     | 2413 (2152, 2730)  | 2251 (2051, 2437)     | 2037 (1750, 2668)     |
| <i>PLXDC1</i>    | 2604 (1832, 3073)  | 2169 (1584, 2429)     | 2103 (1660, 2614)     |
| <i>PDCD6IP</i>   | 2221 (1810, 2656)  | 2191 (1811, 2693)     | 2090 (1670, 2667)     |
| <i>USP53</i>     | 2453 (1900, 3021)  | 1975 (1749, 3022)     | 2171 (1837, 2528)     |
| <i>LIN7C</i>     | 2096 (1826, 2377)  | 2192 (1713, 2688)     | 2018 (1608, 2457)     |
| <i>MAGI2</i>     | 1781 (477, 3243)   | 1693 (378, 3062)      | 2305 (287, 3249)      |
| <i>PARD6A</i>    | 2413 (1933, 2671)  | 2100 (1699, 2587)     | 1839 (1559, 2361)     |
| <i>EPHA2</i>     | 2249 (931, 2906)   | 2022 (1391, 2376)     | 2152 (1219, 2486)     |
| <i>CCDC85C</i>   | 2095 (2004, 2303)  | 2200 (1865, 2384)     | 1965 (1728, 2440)     |
| <i>SAPCD2</i>    | 2478 (1799, 2889)  | 2029 (1677, 2298)     | 1968 (1533, 2341)     |
| <i>JAM2</i>      | 2360 (2068, 2784)  | 1953 (1652, 2744)     | 2032 (1743, 2443)     |
| <i>BVES</i>      | 1971 (1118, 2623)  | 1975 (1136, 2408)     | 2236 (1552, 2738)     |
| <i>CLDN17</i>    | 2829 (1519, 3532)  | 1978 (770, 2766)      | 1660 (695, 2693)      |
| <i>RIGI</i>      | 2068 (1351, 2239)  | 2109 (1248, 2690)     | 1752 (1000, 2309)     |

|                 |                   |                   |                   |
|-----------------|-------------------|-------------------|-------------------|
| <i>CLDN10</i>   | 1127 (178, 1982)  | 2102 (1209, 2796) | 2164 (819, 2675)  |
| <i>PARD3B</i>   | 2128 (1613, 2592) | 1949 (1583, 2702) | 1989 (1562, 2333) |
| <i>WNK4</i>     | 1699 (246, 2548)  | 1857 (66, 2856)   | 2093 (1041, 2757) |
| <i>AMOT</i>     | 1960 (1408, 2305) | 1526 (1124, 2579) | 1801 (1330, 2490) |
| <i>TGFBR1</i>   | 1937 (1147, 2569) | 1764 (1447, 2648) | 1801 (1017, 2321) |
| <i>CLDN19</i>   | 2588 (1226, 3317) | 2334 (735, 2928)  | 1115 (305, 2878)  |
| <i>F11R</i>     | 1813 (1583, 2139) | 1808 (1628, 2275) | 1698 (1515, 2129) |
| <i>VAPA</i>     | 1845 (1408, 2343) | 1631 (1306, 2342) | 1769 (1193, 2258) |
| <i>PALS1</i>    | 1814 (1349, 2341) | 1658 (1235, 2619) | 1686 (1381, 2242) |
| <i>MARVELD2</i> | 1775 (1449, 1951) | 1792 (1365, 2180) | 1592 (1174, 1903) |
| <i>AMOTL1</i>   | 1828 (1581, 2348) | 1748 (1361, 2194) | 1652 (1550, 2046) |
| <i>RAB13</i>    | 1875 (1832, 2169) | 1657 (1375, 2147) | 1503 (1308, 1794) |
| <i>MAPK15</i>   | 949 (439, 2969)   | 1525 (332, 3076)  | 2334 (434, 2758)  |
| <i>PARD6G</i>   | 1603 (1177, 1903) | 1637 (1425, 1998) | 1481 (1249, 2008) |
| <i>CLDN23</i>   | 2176 (1491, 2710) | 1317 (766, 2058)  | 1576 (759, 2374)  |
| <i>WNK3</i>     | 1063 (510, 2645)  | 1714 (559, 2875)  | 1551 (419, 2769)  |
| <i>CLDN16</i>   | 1113 (272, 2248)  | 1648 (1079, 2455) | 1417 (816, 2179)  |
| <i>CLDN12</i>   | 1646 (984, 2322)  | 1435 (919, 2372)  | 1463 (1114, 2320) |
| <i>CLDN7</i>    | 1394 (287, 2453)  | 1209 (467, 2982)  | 1605 (696, 2679)  |
| <i>AOC1</i>     | 1938 (929, 2669)  | 1308 (522, 2762)  | 1544 (402, 2657)  |
| <i>SYMPK</i>    | 1515 (1410, 1766) | 1567 (1255, 1771) | 1347 (1094, 1652) |
| <i>CLDN11</i>   | 1172 (737, 2439)  | 1646 (670, 2924)  | 1232 (683, 2544)  |
| <i>AFDN</i>     | 1605 (843, 2140)  | 1490 (1159, 1861) | 1382 (1121, 1887) |
| <i>LIN7B</i>    | 1458 (1162, 1776) | 1479 (1157, 1721) | 1260 (731, 1815)  |
| <i>CLDN15</i>   | 1520 (1186, 1787) | 1385 (921, 2024)  | 1243 (846, 1767)  |
| <i>LSR</i>      | 1407 (1179, 1854) | 1359 (1147, 1680) | 1321 (1086, 1475) |
| <i>EPPK1</i>    | 932 (502, 1685)   | 1590 (676, 2946)  | 1220 (497, 2441)  |
| <i>CYTH2</i>    | 1517 (1105, 1648) | 1381 (1071, 1673) | 1226 (1009, 1520) |
| <i>LIN7A</i>    | 1843 (567, 2621)  | 1566 (308, 3050)  | 819 (384, 2901)   |
| <i>VASP</i>     | 1191 (1049, 1544) | 1304 (1034, 1503) | 1183 (1050, 1513) |
| <i>CLDN8</i>    | 1074 (521, 2143)  | 1642 (627, 2827)  | 824 (419, 2197)   |
| <i>MTDH</i>     | 1353 (764, 1634)  | 1185 (839, 1838)  | 1195 (850, 1463)  |
| <i>CYTH1</i>    | 1364 (1188, 1609) | 1326 (985, 1586)  | 1120 (953, 1683)  |
| <i>ECT2</i>     | 1438 (1213, 2877) | 1037 (431, 2058)  | 1340 (784, 1808)  |
| <i>PARD6B</i>   | 1067 (456, 2826)  | 1220 (447, 3086)  | 1223 (431, 3090)  |
| <i>PMP22</i>    | 1106 (465, 1490)  | 1157 (764, 1499)  | 1169 (868, 1533)  |
| <i>TJP1</i>     | 1256 (620, 1863)  | 1104 (776, 1576)  | 1142 (921, 1533)  |
| <i>CNTNAP1</i>  | 1101 (768, 1376)  | 1247 (675, 1408)  | 873 (695, 1242)   |
| <i>TBCD</i>     | 1187 (1059, 1497) | 1148 (982, 1330)  | 1026 (924, 1171)  |
| <i>ASH1L</i>    | 626 (202, 3351)   | 939 (199, 3275)   | 2802 (332, 3225)  |
| <i>CLMP</i>     | 1212 (858, 1781)  | 1022 (586, 1663)  | 957 (487, 1491)   |
| <i>JAML</i>     | 1126 (945, 1169)  | 971 (558, 1820)   | 938 (616, 1554)   |
| <i>CGN</i>      | 942 (713, 1266)   | 1006 (811, 1406)  | 1020 (690, 1418)  |
| <i>MPDZ</i>     | 1138 (542, 1573)  | 1012 (850, 1740)  | 982 (845, 1568)   |
| <i>CLDN3</i>    | 157 (34, 1078)    | 197 (1, 2283)     | 1195 (150, 2683)  |
| <i>OCEL1</i>    | 1110 (970, 1251)  | 908 (738, 1388)   | 1004 (673, 1202)  |
| <i>MAGI3</i>    | 1210 (926, 1885)  | 834 (524, 1655)   | 828 (588, 1478)   |
| <i>STRN</i>     | 1069 (246, 3020)  | 1157 (669, 3137)  | 590 (208, 2493)   |
| <i>GJA1</i>     | 707 (543, 1857)   | 825 (431, 1406)   | 866 (303, 1458)   |
| <i>ANK3</i>     | 480 (142, 1089)   | 678 (366, 1690)   | 975 (598, 3198)   |
| <i>MPP7</i>     | 1084 (631, 2914)  | 778 (313, 1402)   | 778 (401, 1363)   |
| <i>CDK4</i>     | 814 (521, 1010)   | 864 (591, 1108)   | 733 (620, 999)    |
| <i>SIPA1L3</i>  | 679 (632, 728)    | 839 (509, 1054)   | 763 (473, 1091)   |
| <i>SYNPO</i>    | 932 (463, 1423)   | 775 (512, 1225)   | 680 (400, 881)    |

|                 |                  |                 |                 |
|-----------------|------------------|-----------------|-----------------|
| <i>DLG1</i>     | 949 (443, 2004)  | 571 (233, 1505) | 723 (410, 1329) |
| <i>FRMD4B</i>   | 1183 (498, 2843) | 536 (310, 928)  | 723 (388, 1251) |
| <i>MARVELD3</i> | 439 (161, 985)   | 693 (345, 2994) | 545 (139, 2327) |
| <i>FRMD4A</i>   | 563 (228, 3463)  | 525 (192, 3132) | 652 (349, 3198) |
| <i>CYTH3</i>    | 587 (419, 736)   | 634 (438, 895)  | 597 (356, 896)  |
| <i>MAGI1</i>    | 522 (130, 973)   | 413 (200, 1010) | 840 (305, 3004) |
| <i>NFASC</i>    | 1011 (495, 3153) | 560 (250, 2379) | 637 (268, 3017) |
| <i>PATJ</i>     | 223 (124, 437)   | 848 (367, 2948) | 678 (165, 2795) |
| <i>ARHGAP17</i> | 636 (334, 804)   | 572 (321, 675)  | 454 (321, 758)  |
| <i>AMOTL2</i>   | 551 (330, 920)   | 480 (264, 910)  | 657 (404, 1185) |
| <i>DLG3</i>     | 469 (210, 890)   | 401 (265, 1015) | 432 (200, 851)  |
| <i>UBN1</i>     | 393 (208, 771)   | 392 (127, 2529) | 453 (177, 3180) |

Figures show median expression (with interquartile range in parentheses) by trial arm. Results are ordered by median expression level (high to low) among all Uganda participants. P-values (not shown) for differences between trial arms were calculated from Kruskal-Wallis test and adjusted for multiple testing using the false discovery rate (FDR), all FDR-adjusted p-values were >0.5.

**Supplementary Table 6. Foreskin cytokine genes excluded from analysis due to being detected in less than 70% of participant samples.**

| <b>Gene</b>                   | <b>n/N (%) expressing gene overall, N=139</b> | <b>n/N (%) expressing gene, South Africa, N=68</b> | <b>n/N (%) expressing gene, Uganda, N=71</b> | <b>p-value<sup>1</sup></b> |
|-------------------------------|-----------------------------------------------|----------------------------------------------------|----------------------------------------------|----------------------------|
| <i>IFN<math>\alpha</math></i> | 0 (0%)                                        | 0 (0%)                                             | 0 (0%)                                       | --                         |
| <i>IL2</i>                    | 5 (3.6%)                                      | 1 (1.5%)                                           | 4 (5.6%)                                     | 0.37                       |
| <i>IL4</i>                    | 5 (3.6%)                                      | 4 (5.9%)                                           | 1 (1.4%)                                     | 0.20                       |
| <i>IL31</i>                   | 28 (20.1%)                                    | 16 (23.5%)                                         | 12 (16.9%)                                   | 0.40                       |
| <i>IL17A</i>                  | 54 (38.8%)                                    | 35 (51.5%)                                         | 19 (26.8%)                                   | 0.003                      |
| <i>IL17F</i>                  | 60 (43.2%)                                    | 41 (60.3%)                                         | 19 (26.8%)                                   | 0.001                      |
| <i>IFN<math>\gamma</math></i> | 70 (50.4%)                                    | 31 (45.6%)                                         | 39 (54.9%)                                   | 0.31                       |
| <i>IL13</i>                   | 78 (56.1%)                                    | 36 (52.9%)                                         | 42 (59.2%)                                   | 0.50                       |

<sup>1</sup>P-value for comparison of proportions expressing gene between South Africa and Uganda participants, generated using Fisher's exact test.

**Supplementary Table 7. Effect of oral PrEP on cytokine gene expression levels in tissue, overall and by country.**

| Gene                                   | PrEP = FTC-TDF    | PrEP = FTC-TAF    | PrEP = None         | p-value |
|----------------------------------------|-------------------|-------------------|---------------------|---------|
| <b>All participants</b>                |                   |                   |                     |         |
| <i>SMAD4</i>                           | 3114 (1069, 3298) | 2765 (747, 3138)  | 2727 (583, 3255)    | 0.79    |
| <i>TNF</i>                             | 2317 (1945, 2723) | 1848 (1215, 2524) | 2455 (1572, 2880)   | 0.07    |
| <i>IL33</i>                            | 2281 (1612, 2662) | 2076 (1424, 2880) | 2202 (1605, 3044)   | 0.90    |
| <i>IL18</i>                            | 1874 (1695, 2664) | 2011 (1603, 2730) | 2282 (1597, 2718)   | 0.96    |
| <i>TGFβ1</i>                           | 2740 (547, 3259)  | 2570 (499, 3187)  | 1501 (532, 3090)    | 0.77    |
| <i>EGF</i>                             | 1545 (663, 2316)  | 2194 (1466, 2773) | 1847.5 (851, 2834)  | 0.37    |
| <i>IL1β</i>                            | 1861 (293, 2762)  | 1802 (692, 2367)  | 2024 (811, 2802)    | 0.49    |
| <i>MMP9</i>                            | 1788 (619, 2746)  | 1653 (1204, 2811) | 2081 (1229, 2884)   | 0.74    |
| <i>IL1α</i>                            | 1849 (589, 2996)  | 2222 (309, 2675)  | 1466 (498, 2637)    | 0.85    |
| <i>IL8</i>                             | 1014 (170, 2076)  | 1721 (2, 2788)    | 1692 (660, 2696)    | 0.64    |
| <i>VEGF</i>                            | 1758 (1239, 2425) | 1649 (969, 2214)  | 1287 (753, 2265)    | 0.52    |
| <i>IL6</i>                             | 1206 (265, 2317)  | 1279 (156, 2522)  | 1588 (447, 2649)    | 0.85    |
| <i>IL10</i>                            | 859 (2, 2930)     | 1388 (3, 2318)    | 1158.5 (36, 2361)   | 0.89    |
| <b>South African participants only</b> |                   |                   |                     |         |
| <i>SMAD4</i>                           | 2998 (934, 3298)  | 2733 (814, 3138)  | 2372 (160, 3457)    | 0.72    |
| <i>IL33</i>                            | 2380 (1539, 2674) | 2331 (1820, 3187) | 2507 (1531, 3202)   | 0.92    |
| <i>MMP9</i>                            | 2447 (1844, 3251) | 2262 (1421, 2904) | 2245 (1353, 3077)   | 0.97    |
| <i>TNF</i>                             | 2202 (1187, 2413) | 1781 (794, 2388)  | 2481 (1718, 2942)   | 0.10    |
| <i>IL18</i>                            | 1755 (1103, 2488) | 1925 (1497, 2713) | 2266 (1521.5, 2716) | 0.71    |
| <i>EGF</i>                             | 1132 (430, 2197)  | 2226 (1205, 2773) | 2094 (658, 3164)    | 0.41    |
| <i>VEGF</i>                            | 2396 (1743, 2705) | 1980 (1268, 2465) | 1472 (1036, 2574)   | 0.56    |
| <i>IL1α</i>                            | 1836 (601, 2750)  | 2222 (309, 2876)  | 1069 (350, 2390)    | 0.49    |
| <i>IL1β</i>                            | 1861 (831, 2468)  | 1135 (524, 2522)  | 1929 (677, 2796)    | 0.92    |
| <i>IL6</i>                             | 640.5 (2, 2062)   | 1113 (2, 2196)    | 2085 (54, 2886)     | 0.43    |
| <i>IL10</i>                            | 1609 (2, 3151)    | 1706 (138, 2453)  | 1217 (2, 2311)      | 0.86    |
| <i>IL8</i>                             | 1294 (227, 2658)  | 671 (2, 2253)     | 2065 (174, 2900)    | 0.38    |
| <i>TGFβ1</i>                           | 679 (278, 2553)   | 1273 (439, 2848)  | 736 (489, 1501)     | 0.69    |
| <b>Ugandan participants only</b>       |                   |                   |                     |         |
| <i>TGFβ1</i>                           | 3120 (2659, 3650) | 3113 (2362, 3333) | 3005 (820, 3297)    | 0.65    |
| <i>SMAD4</i>                           | 3140 (1151, 3386) | 2850 (302, 3161)  | 2853 (1087, 3181)   | 0.65    |
| <i>IL18</i>                            | 2215 (1820, 2688) | 2225 (1749, 2803) | 2295 (1633, 2720)   | 0.99    |
| <i>TNF</i>                             | 2420 (2134, 2880) | 2047 (1305, 2604) | 2414 (1556, 2884)   | 0.48    |
| <i>IL1α</i>                            | 2380 (283, 3409)  | 2069 (90, 2609)   | 2219 (523, 2878)    | 0.78    |
| <i>IL1β</i>                            | 1564 (39, 3138)   | 1941 (1020, 2339) | 2120 (1368, 2895)   | 0.59    |
| <i>EGF</i>                             | 1833 (815, 3024)  | 2161 (1596, 2784) | 1743 (885, 2827)    | 0.74    |
| <i>IL33</i>                            | 2019 (1612, 2614) | 1863 (1302, 2456) | 1952 (1599, 3025)   | 0.65    |
| <i>IL8</i>                             | 1014 (60, 182)    | 1995 (494, 3032)  | 1524 (841, 2642)    | 0.43    |
| <i>IL6</i>                             | 1383 (1160, 2532) | 1801 (485, 2714)  | 1551 (486, 2380)    | 0.95    |
| <i>MMP9</i>                            | 973 (359, 1657)   | 1539 (805, 2246)  | 1776 (1031, 2761)   | 0.26    |
| <i>VEGF</i>                            | 1242 (998, 1676)  | 1255 (793, 1914)  | 1184 (470, 1815)    | 0.74    |
| <i>IL10</i>                            | 593 (2, 2203)     | 1183 (2, 2197)    | 1069 (133, 2452)    | 0.92    |

Median expression (with interquartile range in parentheses) by trial arm is shown. Results are ordered by median expression level (high to low) among all participants. P-values for differences between trial arms were calculated from Kruskal-Wallis test and adjusted for multiple testing using the false discovery rate (FDR), all FDR-adjusted p-values were >0.5.

**Supplementary Table 8. Correlations of tight junctions and cytokines gene expression with drug concentrations in foreskin tissue.**

| TJ Genes        | Correlation <sup>1</sup> with TDF-DP<br>(p-value) | TJ Gene          | Correlation <sup>1</sup> with FTC-TP<br>(p-value) |
|-----------------|---------------------------------------------------|------------------|---------------------------------------------------|
| <i>BVES</i>     | 0.23 (0.01)                                       | <i>AOC1</i>      | -0.22 (0.01)                                      |
| <i>MXRA8</i>    | 0.2 (0.03)                                        | <i>LIN7A</i>     | 0.21 (0.02)                                       |
| <i>LIN7B</i>    | -0.19 (0.03)                                      | <i>CLDN7</i>     | 0.2 (0.02)                                        |
| <i>CXADR</i>    | -0.19 (0.04)                                      | <i>MXRA8</i>     | 0.19 (0.03)                                       |
| <i>ESAM</i>     | -0.18 (0.05)                                      | <i>WNK3</i>      | 0.18 (0.04)                                       |
| <i>AMOT</i>     | 0.17 (0.07)                                       | <i>FRMD4A</i>    | -0.18 (0.05)                                      |
| <i>ARHGAP17</i> | -0.16 (0.07)                                      | <i>JAM3</i>      | -0.16 (0.07)                                      |
| <i>SH3BP1</i>   | 0.16 (0.08)                                       | <i>ADCYAP1R1</i> | -0.16 (0.07)                                      |
| <i>MAPK15</i>   | 0.15 (0.09)                                       | <i>NFASC</i>     | -0.16 (0.07)                                      |
| <i>CYTH3</i>    | -0.15 (0.09)                                      | <i>LIN7B</i>     | -0.15 (0.09)                                      |
| <i>CLMP</i>     | -0.15 (0.09)                                      | <i>OCEL1</i>     | -0.15 (0.09)                                      |
| <i>PARD6A</i>   | -0.14 (0.12)                                      | <i>SH3BP1</i>    | 0.15 (0.11)                                       |
| <i>PARD6B</i>   | -0.14 (0.13)                                      | <i>MAPK15</i>    | 0.14 (0.12)                                       |
| <i>CLDN23</i>   | 0.13 (0.15)                                       | <i>CLDN11</i>    | 0.14 (0.12)                                       |
| <i>RAB13</i>    | -0.13 (0.17)                                      | <i>CLDN16</i>    | 0.14 (0.13)                                       |
| <i>OCEL1</i>    | -0.12 (0.18)                                      | <i>CLMP</i>      | -0.14 (0.14)                                      |
| <i>STRN</i>     | -0.12 (0.19)                                      | <i>ESAM</i>      | -0.13 (0.14)                                      |
| <i>TBCD</i>     | -0.12 (0.20)                                      | <i>CCND1</i>     | -0.13 (0.14)                                      |
| <i>MPP7</i>     | -0.11 (0.23)                                      | <i>ECT2</i>      | 0.13 (0.15)                                       |
| <i>CDH5</i>     | 0.11 (0.24)                                       | <i>CLDN10</i>    | -0.13 (0.16)                                      |
| <i>CLDN5</i>    | -0.11 (0.24)                                      | <i>PRKCI</i>     | -0.13 (0.17)                                      |
| <i>PARD3B</i>   | 0.11 (0.24)                                       | <i>JAM2</i>      | -0.13 (0.17)                                      |
| <i>FRMD4B</i>   | -0.10 (0.25)                                      | <i>EPCAM</i>     | -0.12 (0.17)                                      |
| <i>LSR</i>      | -0.10 (0.26)                                      | <i>ARHGAP17</i>  | -0.12 (0.17)                                      |
| <i>NPHP4</i>    | 0.10 (0.27)                                       | <i>CYTH3</i>     | -0.12 (0.19)                                      |
| <i>SYMPK</i>    | -0.10 (0.29)                                      | <i>CNTNAP1</i>   | -0.11 (0.21)                                      |
| <i>SYNPO</i>    | -0.09 (0.32)                                      | <i>DLG3</i>      | -0.11 (0.21)                                      |
| <i>JAM3</i>     | -0.09 (0.33)                                      | <i>BVES</i>      | 0.11 (0.23)                                       |
| <i>CLDN10</i>   | -0.09 (0.33)                                      | <i>PARD3</i>     | 0.11 (0.25)                                       |
| <i>PALS1</i>    | 0.08 (0.35)                                       | <i>CLDN5</i>     | -0.1 (0.25)                                       |
| <i>MARVELD3</i> | 0.08 (0.36)                                       | <i>SYNPO</i>     | -0.1 (0.26)                                       |
| <i>PARD3</i>    | 0.08 (0.36)                                       | <i>RIGI</i>      | 0.09 (0.30)                                       |
| <i>ANK3</i>     | -0.08 (0.37)                                      | <i>AMOT</i>      | 0.09 (0.31)                                       |
| <i>FZD5</i>     | -0.08 (0.38)                                      | <i>SIPA1L3</i>   | 0.09 (0.31)                                       |
| <i>OCLN</i>     | 0.08 (0.39)                                       | <i>EPB41L4B</i>  | 0.09 (0.33)                                       |
| <i>EPB41L4B</i> | 0.08 (0.41)                                       | <i>CXADR</i>     | -0.09 (0.34)                                      |
| <i>CCDC85C</i>  | -0.07 (0.41)                                      | <i>CLDN4</i>     | 0.08 (0.37)                                       |
| <i>CYTH1</i>    | -0.07 (0.42)                                      | <i>LSR</i>       | -0.08 (0.40)                                      |
| <i>TRAF4</i>    | -0.07 (0.42)                                      | <i>CLDN1</i>     | -0.08 (0.40)                                      |
| <i>TJAP1</i>    | 0.07 (0.42)                                       | <i>TBCD</i>      | -0.08 (0.41)                                      |
| <i>WNK4</i>     | -0.07 (0.43)                                      | <i>JAML</i>      | 0.07 (0.43)                                       |
| <i>CLDN19</i>   | -0.07 (0.43)                                      | <i>WNK4</i>      | -0.07 (0.45)                                      |
| <i>ILDR1</i>    | -0.07 (0.44)                                      | <i>PARD6G</i>    | 0.07 (0.47)                                       |
| <i>EPHA2</i>    | -0.07 (0.44)                                      | <i>ACTB</i>      | -0.07 (0.47)                                      |
| <i>RAPGEF2</i>  | 0.07 (0.44)                                       | <i>PATJ</i>      | 0.07 (0.47)                                       |

|                 |              |                 |              |
|-----------------|--------------|-----------------|--------------|
| <i>F11R</i>     | 0.07 (0.45)  | <i>ILDR1</i>    | -0.06 (0.48) |
| <i>ACTB</i>     | -0.07 (0.45) | <i>NPHP1</i>    | -0.06 (0.49) |
| <i>CLDN15</i>   | -0.07 (0.46) | <i>RAPGEF2</i>  | 0.06 (0.50)  |
| <i>JAM2</i>     | -0.07 (0.46) | <i>USP53</i>    | -0.06 (0.51) |
| <i>TGFBR1</i>   | 0.07 (0.46)  | <i>MAGI3</i>    | -0.06 (0.52) |
| <i>GJA1</i>     | -0.07 (0.47) | <i>MAGI2</i>    | 0.06 (0.53)  |
| <i>EPCAM</i>    | -0.06 (0.49) | <i>PARD6A</i>   | -0.06 (0.54) |
| <i>ATP7B</i>    | 0.06 (0.50)  | <i>PMP22</i>    | -0.06 (0.54) |
| <i>CGN</i>      | -0.06 (0.50) | <i>RAB13</i>    | -0.05 (0.56) |
| <i>CLDN4</i>    | 0.06 (0.51)  | <i>CLDN23</i>   | 0.05 (0.58)  |
| <i>RIGI</i>     | 0.06 (0.51)  | <i>MPP7</i>     | -0.05 (0.58) |
| <i>MAGI1</i>    | 0.06 (0.51)  | <i>CLDN15</i>   | 0.05 (0.59)  |
| <i>DLG3</i>     | -0.06 (0.51) | <i>SYMPK</i>    | -0.05 (0.60) |
| <i>AOC1</i>     | -0.06 (0.51) | <i>UBN1</i>     | -0.05 (0.61) |
| <i>VASP</i>     | -0.06 (0.51) | <i>RPGRIPL</i>  | 0.05 (0.62)  |
| <i>VAPA</i>     | 0.06 (0.53)  | <i>TGFBR1</i>   | -0.04 (0.63) |
| <i>ECT2</i>     | 0.06 (0.53)  | <i>ARHGEF2</i>  | -0.04 (0.63) |
| <i>CNTNAP1</i>  | -0.06 (0.54) | <i>MICALL2</i>  | 0.04 (0.64)  |
| <i>CYTH2</i>    | -0.05 (0.55) | <i>SAPCD2</i>   | -0.04 (0.65) |
| <i>MICALL2</i>  | 0.05 (0.56)  | <i>CYTH2</i>    | -0.04 (0.67) |
| <i>CLDN11</i>   | -0.05 (0.56) | <i>CCDC85C</i>  | -0.04 (0.67) |
| <i>CLDN17</i>   | 0.05 (0.59)  | <i>STRN</i>     | 0.04 (0.67)  |
| <i>EPPK1</i>    | -0.05 (0.59) | <i>PARD6B</i>   | -0.04 (0.68) |
| <i>MAGI2</i>    | 0.05 (0.59)  | <i>CLDN3</i>    | 0.04 (0.69)  |
| <i>MAGI3</i>    | -0.05 (0.6)  | <i>ASH1L</i>    | 0.04 (0.69)  |
| <i>ASH1L</i>    | -0.05 (0.61) | <i>MARVELD2</i> | 0.03 (0.72)  |
| <i>JAML</i>     | -0.05 (0.62) | <i>AMOTL1</i>   | 0.03 (0.72)  |
| <i>DLG1</i>     | -0.05 (0.62) | <i>F11R</i>     | 0.03 (0.73)  |
| <i>MARVELD2</i> | 0.04 (0.63)  | <i>TJP3</i>     | 0.03 (0.73)  |
| <i>AMOTL1</i>   | 0.04 (0.63)  | <i>NPHP4</i>    | 0.03 (0.74)  |
| <i>AFDN</i>     | -0.04 (0.64) | <i>AFDN</i>     | -0.03 (0.75) |
| <i>CLDN12</i>   | 0.04 (0.65)  | <i>CDK4</i>     | 0.03 (0.75)  |
| <i>APC</i>      | 0.04 (0.66)  | <i>EPPK1</i>    | 0.03 (0.76)  |
| <i>PATJ</i>     | -0.04 (0.67) | <i>TJAP1</i>    | -0.03 (0.76) |
| <i>TJP3</i>     | -0.04 (0.67) | <i>PDCD6IP</i>  | 0.03 (0.77)  |
| <i>CLDN3</i>    | -0.04 (0.68) | <i>TJP2</i>     | 0.03 (0.78)  |
| <i>TJP2</i>     | -0.04 (0.69) | <i>FRMD4B</i>   | -0.03 (0.78) |
| <i>SAPCD2</i>   | -0.03 (0.70) | <i>CLDN8</i>    | -0.03 (0.78) |
| <i>ARHGEF2</i>  | -0.03 (0.71) | <i>CLDN19</i>   | -0.03 (0.78) |
| <i>CLDN8</i>    | 0.03 (0.73)  | <i>TRAF4</i>    | -0.02 (0.78) |
| <i>SHROOM2</i>  | 0.03 (0.73)  | <i>CLDN12</i>   | -0.02 (0.79) |
| <i>CGNL1</i>    | -0.03 (0.74) | <i>PARD3B</i>   | 0.02 (0.80)  |
| <i>WNK3</i>     | 0.03 (0.75)  | <i>CDH5</i>     | -0.02 (0.80) |
| <i>CLDN1</i>    | 0.03 (0.75)  | <i>VASP</i>     | -0.02 (0.80) |
| <i>CLDN16</i>   | 0.03 (0.76)  | <i>CYTH1</i>    | -0.02 (0.81) |
| <i>LIN7C</i>    | -0.03 (0.76) | <i>ATP7B</i>    | 0.02 (0.81)  |
| <i>UBN1</i>     | 0.03 (0.78)  | <i>OCLN</i>     | 0.02 (0.81)  |
| <i>NFASC</i>    | -0.02 (0.79) | <i>SHROOM2</i>  | 0.02 (0.83)  |
| <i>NPHP1</i>    | -0.02 (0.79) | <i>RAP2B</i>    | 0.02 (0.83)  |
| <i>CLDN7</i>    | 0.02 (0.8)   | <i>PRKCZ</i>    | 0.02 (0.83)  |



|                               |              |                               |              |
|-------------------------------|--------------|-------------------------------|--------------|
| <i>PRKCZ</i>                  | 0.02 (0.82)  | <i>DLG1</i>                   | -0.02 (0.83) |
| <i>POF1B</i>                  | -0.02 (0.85) | <i>VAPA</i>                   | 0.02 (0.84)  |
| <i>CCND1</i>                  | 0.02 (0.85)  | <i>MARVELD3</i>               | -0.02 (0.85) |
| <i>SIPA1L3</i>                | 0.02 (0.86)  | <i>GJA1</i>                   | 0.02 (0.86)  |
| <i>AMOTL2</i>                 | 0.02 (0.86)  | <i>APC</i>                    | -0.02 (0.86) |
| <i>PDCD6IP</i>                | 0.01 (0.87)  | <i>ANK3</i>                   | -0.02 (0.86) |
| <i>USP53</i>                  | 0.01 (0.89)  | <i>PLXDC1</i>                 | 0.02 (0.87)  |
| <i>RAP2B</i>                  | 0.01 (0.89)  | <i>RAP2C</i>                  | -0.02 (0.87) |
| <i>PRKCI</i>                  | 0.01 (0.89)  | <i>LIN7C</i>                  | -0.02 (0.87) |
| <i>PMP22</i>                  | -0.01 (0.91) | <i>PALS1</i>                  | 0.02 (0.87)  |
| <i>CRB3</i>                   | 0.01 (0.92)  | <i>EPHA2</i>                  | -0.01 (0.88) |
| <i>PLXDC1</i>                 | 0.01 (0.92)  | <i>TJP1</i>                   | -0.01 (0.90) |
| <i>CDK4</i>                   | -0.01 (0.92) | <i>AMOTL2</i>                 | 0.01 (0.90)  |
| <i>LIN7A</i>                  | 0.01 (0.92)  | <i>MAGI1</i>                  | -0.01 (0.90) |
| <i>MTDH</i>                   | 0.01 (0.92)  | <i>POF1B</i>                  | 0.01 (0.90)  |
| <i>CTNNB1</i>                 | 0.01 (0.93)  | <i>CGN</i>                    | 0.01 (0.91)  |
| <i>FRMD4A</i>                 | 0.01 (0.95)  | <i>CTNNB1</i>                 | 0.01 (0.91)  |
| <i>TJP1</i>                   | 0.00 (0.96)  | <i>FZD5</i>                   | -0.01 (0.94) |
| <i>RAP2C</i>                  | 0.00 (0.98)  | <i>CRB3</i>                   | 0.00 (0.97)  |
| <i>RPGRIP1L</i>               | 0.00 (0.98)  | <i>MTDH</i>                   | 0.00 (0.99)  |
| <i>ADCYAP1R1</i>              | 0.00 (0.99)  | <i>CLDN17</i>                 | 0.00 (0.99)  |
| <i>MPDZ</i>                   | 0.00 (0.99)  | <i>CGNL1</i>                  | 0.00 (1.00)  |
| <i>PARD6G</i>                 | 0.00 (0.99)  | <i>MPDZ</i>                   | 0.00 (1.00)  |
| Cytokine gene                 |              | Cytokine gene                 |              |
| <i>IL8</i>                    | 0.18 (0.04)  | <i>IL1<math>\beta</math></i>  | 0.25 (0.01)  |
| <i>VEGF</i>                   | -0.18 (0.05) | <i>TGF<math>\beta</math>1</i> | 0.18 (0.05)  |
| <i>IL18</i>                   | 0.17 (0.05)  | <i>IL18</i>                   | 0.14 (0.12)  |
| <i>IL1<math>\beta</math></i>  | 0.13 (0.16)  | <i>SMAD4</i>                  | -0.13 (0.14) |
| <i>SMAD4</i>                  | -0.10 (0.28) | <i>IL8</i>                    | 0.09 (0.33)  |
| <i>TNF</i>                    | 0.09 (0.32)  | <i>VEGF</i>                   | -0.08 (0.41) |
| <i>TGF<math>\beta</math>1</i> | 0.06 (0.50)  | <i>IL6</i>                    | 0.07 (0.47)  |
| <i>EGF</i>                    | 0.05 (0.60)  | <i>IL10</i>                   | 0.05 (0.56)  |
| <i>MMP9</i>                   | -0.02 (0.85) | <i>MMP9</i>                   | 0.05 (0.58)  |
| <i>IL10</i>                   | 0.02 (0.85)  | <i>IL33</i>                   | -0.05 (0.60) |
| <i>IL6</i>                    | 0.01 (0.87)  | <i>IL1<math>\alpha</math></i> | 0.04 (0.63)  |
| <i>IL1<math>\alpha</math></i> | 0.01 (0.94)  | <i>EGF</i>                    | 0.02 (0.83)  |
| <i>IL33</i>                   | 0.00 (0.99)  | <i>TNF</i>                    | -0.02 (0.85) |

<sup>1</sup>Spearman's rank correlation coefficient

P-values shown have not been adjusted for multiple testing. On applying the false discovery rate approach, all adjusted p-values were >0.5.

**Supplementary Table 9. Correlations of tight junctions and cytokines gene expression with p24 concentrations measured in foreskin tissue challenged ex vivo with HIV-1<sub>BaL</sub>.**

| TJ Genes         | Correlation <sup>1</sup> with p24 at day 15 following high titre ex vivo challenge (p-value) | TJ Gene         | Correlation <sup>1</sup> with p24 at day 15 following low titre ex vivo challenge (p-value) |
|------------------|----------------------------------------------------------------------------------------------|-----------------|---------------------------------------------------------------------------------------------|
| <i>MICALL2</i>   | 0.29 (0.12)                                                                                  | <i>CNTNAP1</i>  | 0.28 (0.24)                                                                                 |
| <i>TJAP1</i>     | 0.22 (0.82)                                                                                  | <i>SAPCD2</i>   | 0.24 (0.49)                                                                                 |
| <i>CLDN19</i>    | -0.21 (0.76)                                                                                 | <i>SIPA1L3</i>  | 0.22 (0.51)                                                                                 |
| <i>FRMD4B</i>    | 0.20 (0.69)                                                                                  | <i>CLDN15</i>   | 0.22 (0.47)                                                                                 |
| <i>ILDR1</i>     | -0.20 (0.67)                                                                                 | <i>VASP</i>     | 0.21 (0.47)                                                                                 |
| <i>ANK3</i>      | 0.19 (0.74)                                                                                  | <i>CYTH2</i>    | 0.21 (0.43)                                                                                 |
| <i>CLDN5</i>     | 0.19 (0.67)                                                                                  | <i>LIN7B</i>    | 0.20 (0.40)                                                                                 |
| <i>SYNPO</i>     | -0.18 (0.62)                                                                                 | <i>OCEL1</i>    | 0.20 (0.43)                                                                                 |
| <i>JAML</i>      | -0.17 (0.72)                                                                                 | <i>SH3BP1</i>   | -0.20 (0.39)                                                                                |
| <i>RAP2B</i>     | 0.17 (0.78)                                                                                  | <i>JAM3</i>     | 0.19 (0.47)                                                                                 |
| <i>ARHGEF2</i>   | 0.16 (0.78)                                                                                  | <i>CYTH1</i>    | 0.18 (0.48)                                                                                 |
| <i>WNK3</i>      | 0.16 (0.79)                                                                                  | <i>BVES</i>     | 0.18 (0.46)                                                                                 |
| <i>PARD3</i>     | 0.16 (0.73)                                                                                  | <i>PARD6A</i>   | 0.17 (0.50)                                                                                 |
| <i>BVES</i>      | 0.15 (0.84)                                                                                  | <i>TBCD</i>     | 0.17 (0.47)                                                                                 |
| <i>SHROOM2</i>   | -0.15 (0.80)                                                                                 | <i>RIGI</i>     | 0.16 (0.54)                                                                                 |
| <i>MAPK15</i>    | 0.15 (0.75)                                                                                  | <i>SYMPK</i>    | 0.16 (0.57)                                                                                 |
| <i>CLDN7</i>     | 0.15 (0.73)                                                                                  | <i>ARHGAP17</i> | 0.16 (0.56)                                                                                 |
| <i>CNTNAP1</i>   | -0.15 (0.69)                                                                                 | <i>CCDC85C</i>  | 0.15 (0.58)                                                                                 |
| <i>CLDN11</i>    | -0.14 (0.69)                                                                                 | <i>LSR</i>      | 0.15 (0.60)                                                                                 |
| <i>CLDN15</i>    | -0.14 (0.68)                                                                                 | <i>PMP22</i>    | 0.15 (0.58)                                                                                 |
| <i>TJP2</i>      | -0.14 (0.75)                                                                                 | <i>CLDN3</i>    | -0.14 (0.69)                                                                                |
| <i>USP53</i>     | -0.14 (0.72)                                                                                 | <i>CLMP</i>     | 0.14 (0.68)                                                                                 |
| <i>RAP2C</i>     | -0.13 (0.71)                                                                                 | <i>NFASC</i>    | 0.14 (0.65)                                                                                 |
| <i>CCND1</i>     | 0.13 (0.72)                                                                                  | <i>EPCAM</i>    | -0.14 (0.62)                                                                                |
| <i>TRAF4</i>     | 0.13 (0.72)                                                                                  | <i>PLXDC1</i>   | 0.14 (0.61)                                                                                 |
| <i>MAGI1</i>     | 0.13 (0.69)                                                                                  | <i>POF1B</i>    | -0.14 (0.58)                                                                                |
| <i>AOC1</i>      | -0.13 (0.67)                                                                                 | <i>CGN</i>      | 0.14 (0.59)                                                                                 |
| <i>MARVELD2</i>  | 0.12 (0.73)                                                                                  | <i>FRMD4B</i>   | 0.14 (0.57)                                                                                 |
| <i>CDH5</i>      | 0.12 (0.77)                                                                                  | <i>CLDN5</i>    | 0.13 (0.60)                                                                                 |
| <i>LIN7B</i>     | -0.12 (0.75)                                                                                 | <i>ESAM</i>     | 0.13 (0.60)                                                                                 |
| <i>MPP7</i>      | -0.12 (0.74)                                                                                 | <i>RAB13</i>    | 0.13 (0.60)                                                                                 |
| <i>CGNL1</i>     | 0.12 (0.74)                                                                                  | <i>PRKCZ</i>    | -0.13 (0.60)                                                                                |
| <i>ADCYAP1R1</i> | 0.11 (0.79)                                                                                  | <i>MXRA8</i>    | -0.12 (0.63)                                                                                |
| <i>ARHGAP17</i>  | -0.11 (0.79)                                                                                 | <i>PATJ</i>     | 0.12 (0.63)                                                                                 |
| <i>NPHP4</i>     | -0.11 (0.79)                                                                                 | <i>FZD5</i>     | -0.12 (0.69)                                                                                |
| <i>EPHA2</i>     | -0.11 (0.80)                                                                                 | <i>MAPK15</i>   | -0.11 (0.67)                                                                                |
| <i>PATJ</i>      | 0.10 (0.79)                                                                                  | <i>PARD6B</i>   | 0.11 (0.66)                                                                                 |
| <i>CLDN3</i>     | -0.10 (0.90)                                                                                 | <i>MPDZ</i>     | 0.11 (0.65)                                                                                 |
| <i>MTDH</i>      | 0.09 (0.90)                                                                                  | <i>AMOTL2</i>   | 0.11 (0.64)                                                                                 |
| <i>UBN1</i>      | -0.09 (0.90)                                                                                 | <i>CLDN17</i>   | 0.11 (0.65)                                                                                 |
| <i>TJP3</i>      | 0.09 (0.88)                                                                                  | <i>CDK4</i>     | 0.11 (0.64)                                                                                 |
| <i>AMOT</i>      | 0.09 (0.88)                                                                                  | <i>AMOT</i>     | -0.11 (0.63)                                                                                |
| <i>SH3BP1</i>    | 0.09 (0.88)                                                                                  | <i>CXADR</i>    | 0.11 (0.66)                                                                                 |

|                 |              |                 |              |
|-----------------|--------------|-----------------|--------------|
| <i>PRKCZ</i>    | 0.09 (0.89)  | <i>ASH1L</i>    | 0.11 (0.65)  |
| <i>MARVELD3</i> | 0.09 (0.87)  | <i>MARVELD3</i> | 0.11 (0.64)  |
| <i>JAM3</i>     | 0.09 (0.86)  | <i>UBN1</i>     | 0.11 (0.63)  |
| <i>ACTB</i>     | 0.09 (0.87)  | <i>STRN</i>     | 0.10 (0.66)  |
| <i>RAPGEF2</i>  | 0.09 (0.86)  | <i>CLDN10</i>   | 0.10 (0.68)  |
| <i>CGN</i>      | 0.08 (0.86)  | <i>CLDN16</i>   | -0.10 (0.68) |
| <i>OCEL1</i>    | -0.08 (0.84) | <i>CRB3</i>     | 0.09 (0.70)  |
| <i>AMOTL2</i>   | -0.08 (0.84) | <i>ARHGEF2</i>  | 0.09 (0.78)  |
| <i>OCLN</i>     | 0.08 (0.83)  | <i>AOC1</i>     | 0.08 (0.84)  |
| <i>CYTH3</i>    | -0.08 (0.85) | <i>CLDN23</i>   | -0.08 (0.82) |
| <i>PARD6G</i>   | 0.08 (0.83)  | <i>CLDN1</i>    | -0.08 (0.81) |
| <i>ASH1L</i>    | 0.08 (0.82)  | <i>AFDN</i>     | 0.08 (0.84)  |
| <i>MAGI3</i>    | -0.08 (0.85) | <i>GJA1</i>     | 0.08 (0.84)  |
| <i>LIN7C</i>    | -0.08 (0.84) | <i>ILDR1</i>    | -0.07 (0.85) |
| <i>PARD6A</i>   | -0.07 (0.86) | <i>JAM2</i>     | 0.07 (0.85)  |
| <i>MAGI2</i>    | 0.07 (0.87)  | <i>CLDN8</i>    | -0.07 (0.83) |
| <i>SYMPK</i>    | -0.07 (0.87) | <i>CTNNB1</i>   | 0.07 (0.87)  |
| <i>CLDN23</i>   | 0.07 (0.87)  | <i>MAGI2</i>    | 0.07 (0.88)  |
| <i>AMOTL1</i>   | 0.07 (0.89)  | <i>WNK3</i>     | 0.07 (0.87)  |
| <i>EPPK1</i>    | 0.07 (0.88)  | <i>MARVELD2</i> | -0.07 (0.87) |
| <i>CLDN4</i>    | 0.06 (0.89)  | <i>TRAF4</i>    | -0.06 (0.89) |
| <i>MXRA8</i>    | -0.06 (0.89) | <i>JAML</i>     | 0.06 (0.88)  |
| <i>RIGI</i>     | 0.06 (0.90)  | <i>PALS1</i>    | -0.06 (0.89) |
| <i>NPHP1</i>    | 0.06 (0.90)  | <i>ACTB</i>     | 0.06 (0.89)  |
| <i>CLDN10</i>   | 0.06 (0.89)  | <i>CLDN7</i>    | 0.06 (0.90)  |
| <i>RAB13</i>    | 0.06 (0.89)  | <i>ATP7B</i>    | 0.06 (0.91)  |
| <i>RPGRIP1L</i> | 0.06 (0.88)  | <i>LIN7C</i>    | 0.06 (0.91)  |
| <i>APC</i>      | 0.06 (0.88)  | <i>CLDN11</i>   | 0.06 (0.91)  |
| <i>PLXDC1</i>   | 0.06 (0.87)  | <i>EPPK1</i>    | -0.05 (0.90) |
| <i>CLDN16</i>   | -0.06 (0.87) | <i>TGFBR1</i>   | 0.05 (0.90)  |
| <i>CXADR</i>    | -0.06 (0.87) | <i>TJP1</i>     | 0.05 (0.90)  |
| <i>PMP22</i>    | 0.05 (0.92)  | <i>TJAP1</i>    | -0.05 (0.91) |
| <i>LIN7A</i>    | -0.05 (0.91) | <i>CYTH3</i>    | 0.05 (0.94)  |
| <i>FRMD4A</i>   | 0.05 (0.93)  | <i>ECT2</i>     | -0.05 (0.93) |
| <i>CLDN8</i>    | -0.05 (0.93) | <i>CCND1</i>    | 0.05 (0.93)  |
| <i>EPB41L4B</i> | 0.05 (0.92)  | <i>WNK4</i>     | -0.05 (0.92) |
| <i>DLG3</i>     | -0.04 (0.93) | <i>PARD3</i>    | -0.04 (0.94) |
| <i>POF1B</i>    | -0.04 (0.92) | <i>TJP3</i>     | -0.04 (0.95) |
| <i>F11R</i>     | 0.04 (0.92)  | <i>TJP2</i>     | -0.04 (0.94) |
| <i>PARD6B</i>   | -0.04 (0.91) | <i>RPGRIP1L</i> | -0.04 (0.94) |
| <i>FZD5</i>     | 0.04 (0.91)  | <i>CDH5</i>     | -0.04 (0.94) |
| <i>CLDN12</i>   | -0.04 (0.91) | <i>SYNPO</i>    | 0.04 (0.93)  |
| <i>DLG1</i>     | 0.04 (0.90)  | <i>CLDN12</i>   | -0.04 (0.92) |
| <i>LSR</i>      | -0.04 (0.90) | <i>CLDN4</i>    | -0.04 (0.91) |
| <i>PRKCI</i>    | -0.04 (0.93) | <i>CGNL1</i>    | -0.04 (0.92) |
| <i>PDCD6IP</i>  | 0.03 (0.95)  | <i>NPHP1</i>    | -0.03 (0.98) |
| <i>STRN</i>     | -0.03 (0.95) | <i>PRKCI</i>    | -0.03 (0.97) |
| <i>GJA1</i>     | 0.03 (0.97)  | <i>EPB41L4B</i> | 0.03 (1.00)  |
| <i>JAM2</i>     | 0.03 (0.97)  | <i>PDCD6IP</i>  | 0.02 (1.00)  |
| <i>CDK4</i>     | -0.03 (0.98) | <i>PARD3B</i>   | -0.02 (1.00) |

|                |              |                  |              |
|----------------|--------------|------------------|--------------|
| <i>TBCD</i>    | -0.03 (0.98) | <i>SHROOM2</i>   | 0.02 (0.99)  |
| <i>PALS1</i>   | 0.02 (0.98)  | <i>AMOTL1</i>    | -0.02 (1.00) |
| <i>CLDN1</i>   | -0.02 (0.98) | <i>APC</i>       | 0.02 (1.00)  |
| <i>MPDZ</i>    | 0.02 (0.97)  | <i>RAP2B</i>     | -0.02 (0.99) |
| <i>CYTH1</i>   | -0.02 (0.99) | <i>PARD6G</i>    | 0.02 (0.98)  |
| <i>CRB3</i>    | -0.02 (1.00) | <i>MICALL2</i>   | -0.02 (1.00) |
| <i>AFDN</i>    | 0.02 (1.00)  | <i>MPP7</i>      | 0.01 (1.00)  |
| <i>WNK4</i>    | 0.02 (1.00)  | <i>MTDH</i>      | 0.01 (1.00)  |
| <i>ECT2</i>    | -0.02 (1.00) | <i>DLG3</i>      | -0.01 (1.00) |
| <i>ATP7B</i>   | 0.01 (1.00)  | <i>FRMD4A</i>    | -0.01 (1.00) |
| <i>SAPCD2</i>  | -0.01 (1.00) | <i>USP53</i>     | 0.01 (1.00)  |
| <i>CLMP</i>    | 0.01 (1.00)  | <i>ANK3</i>      | -0.01 (1.00) |
| <i>CCDC85C</i> | 0.01 (1.00)  | <i>EPHA2</i>     | 0.01 (1.00)  |
| <i>EPCAM</i>   | -0.01 (1.00) | <i>F11R</i>      | 0.01 (1.00)  |
| <i>NFASC</i>   | -0.01 (1.00) | <i>DLG1</i>      | 0.01 (1.00)  |
| <i>SIPA1L3</i> | 0.01 (1.00)  | <i>MAG11</i>     | -0.01 (1.00) |
| <i>VASP</i>    | -0.01 (0.99) | <i>MAG13</i>     | -0.01 (1.00) |
| <i>CTNNB1</i>  | 0.01 (0.99)  | <i>LIN7A</i>     | -0.01 (1.00) |
| <i>CYTH2</i>   | -0.01 (0.98) | <i>ADCYAP1R1</i> | -0.01 (1.00) |
| <i>TGFBR1</i>  | 0.00 (1.00)  | <i>NPHP4</i>     | -0.01 (1.00) |
| <i>PARD3B</i>  | 0.00 (1.00)  | <i>CLDN19</i>    | 0.00 (1.00)  |
| <i>ESAM</i>    | 0.00 (1.00)  | <i>RAPGEF2</i>   | 0.00 (1.00)  |
| <i>VAPA</i>    | 0.00 (1.00)  | <i>RAP2C</i>     | 0.00 (1.00)  |
| <i>TJP1</i>    | 0.00 (0.99)  | <i>OCLN</i>      | 0.00 (1.00)  |
| <i>CLDN17</i>  | 0.00 (1.00)  | <i>VAPA</i>      | 0.00 (1.00)  |

<sup>1</sup>Spearman's rank correlation coefficient

P-values shown have been adjusted for multiple testing using the false discovery rate approach.

**Supplementary Table 10. Effect of oral PrEP on expression of tight junction proteins detected by Western blot.**

| Protein                 | PrEP = None          | PrEP = FTC-TDF     | PrEP = FTC-TAF      | p-value |
|-------------------------|----------------------|--------------------|---------------------|---------|
| <b>All participants</b> |                      |                    |                     |         |
| Claudin-1               | 0.31 (0.04, 0.74)    | 0.27 (0.13, 0.69)  | 0.28 (0.14, 0.74)   | 0.91    |
| Occludin                | 2.46 (0.54, 5.58)    | 2.25 (0.59, 4.81)  | 1.55 (0.77, 4.03)   | 0.93    |
| Zonula occludens-1      | 0.008 (0.001, 0.023) | 0.01 (0.003, 0.05) | 0.01 (0.0002, 0.05) | 0.65    |

Claudin-1 coded by *CLDN-1*; Occludin coded by *OCLN*; Zonula occludens-1 (ZO-1) coded by *TJP1* gene.

Median expression (with interquartile range in parentheses) by trial arm, and p-value for differences between trial arms from Kruskal-Wallis test are shown.

**Supplementary Figure 1. Heatmap showing expression levels (gene counts) of 118 TJ genes for 139 individuals included in the CHAPS study.** Each row represents one individual, and each column represents one gene. Individuals (rows) are grouped by country, and ordered in the chronological order in which they were enrolled in the study. Genes (columns) are ordered by median gene expression level (high to low). Darker red values indicate higher gene counts while darker blue values indicate low gene counts, as shown in the legend.

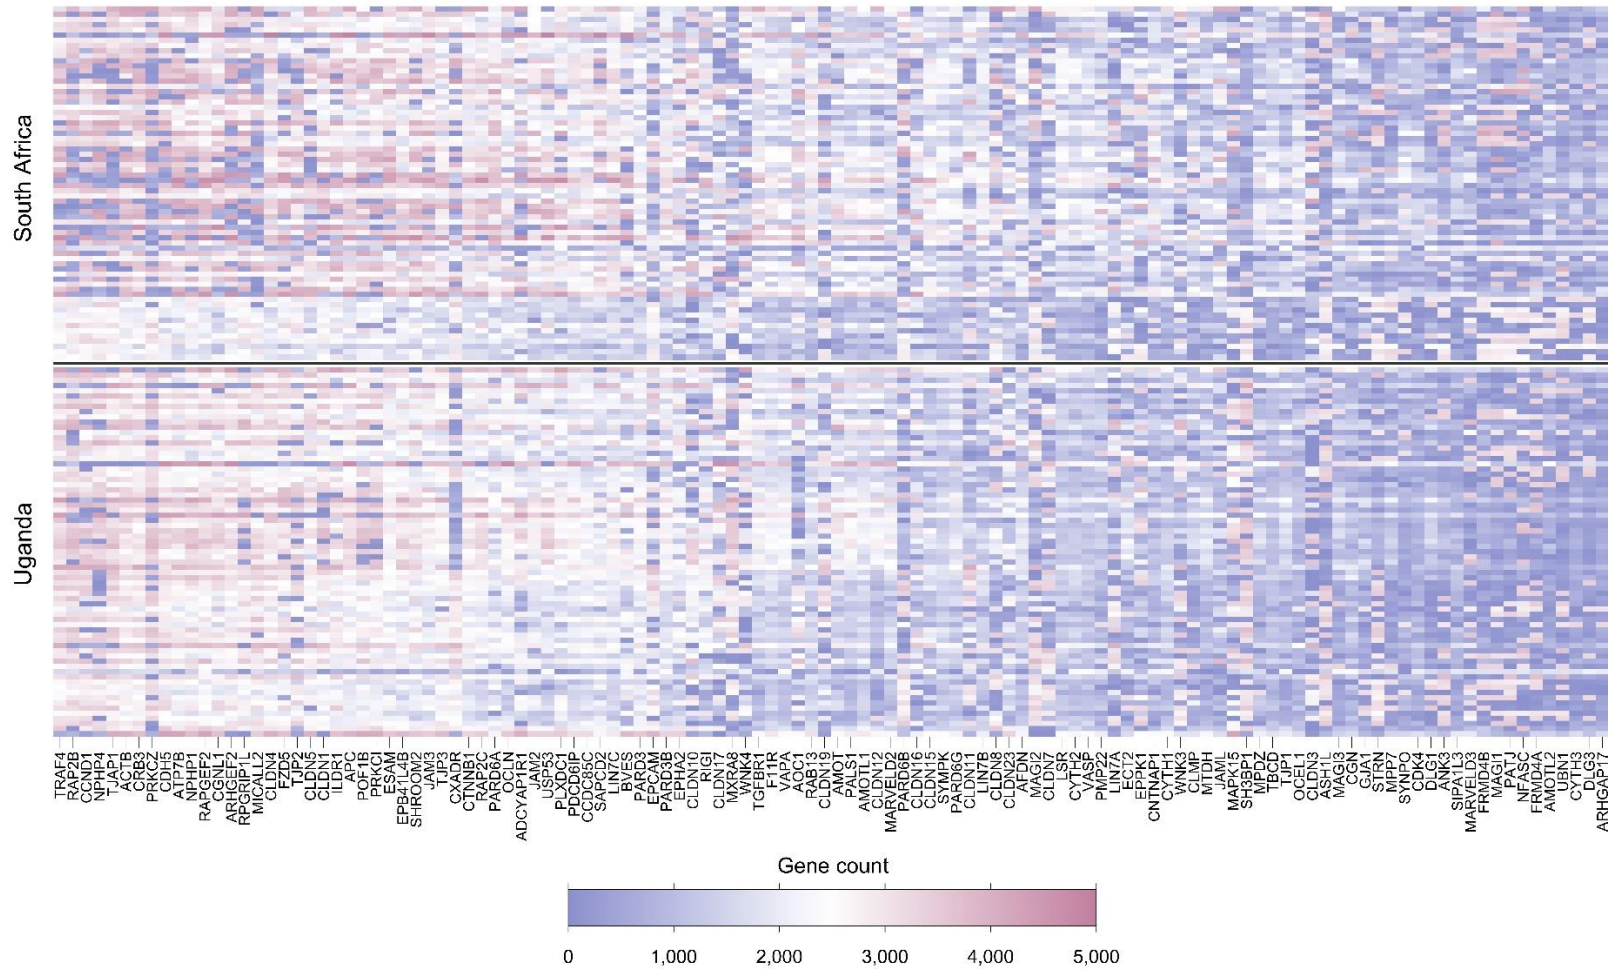

**Supplementary Figure 2. Heat map showing pairwise correlation coefficients between tight junction gene expression levels.** Each row and column represent one of the 118 TJ genes. Spearman's correlation coefficient was calculated between expression levels for each pairwise combination of TJ genes. Darker red values indicate higher positive correlation while darker blue values indicate higher negative correlation, as shown in the legend.

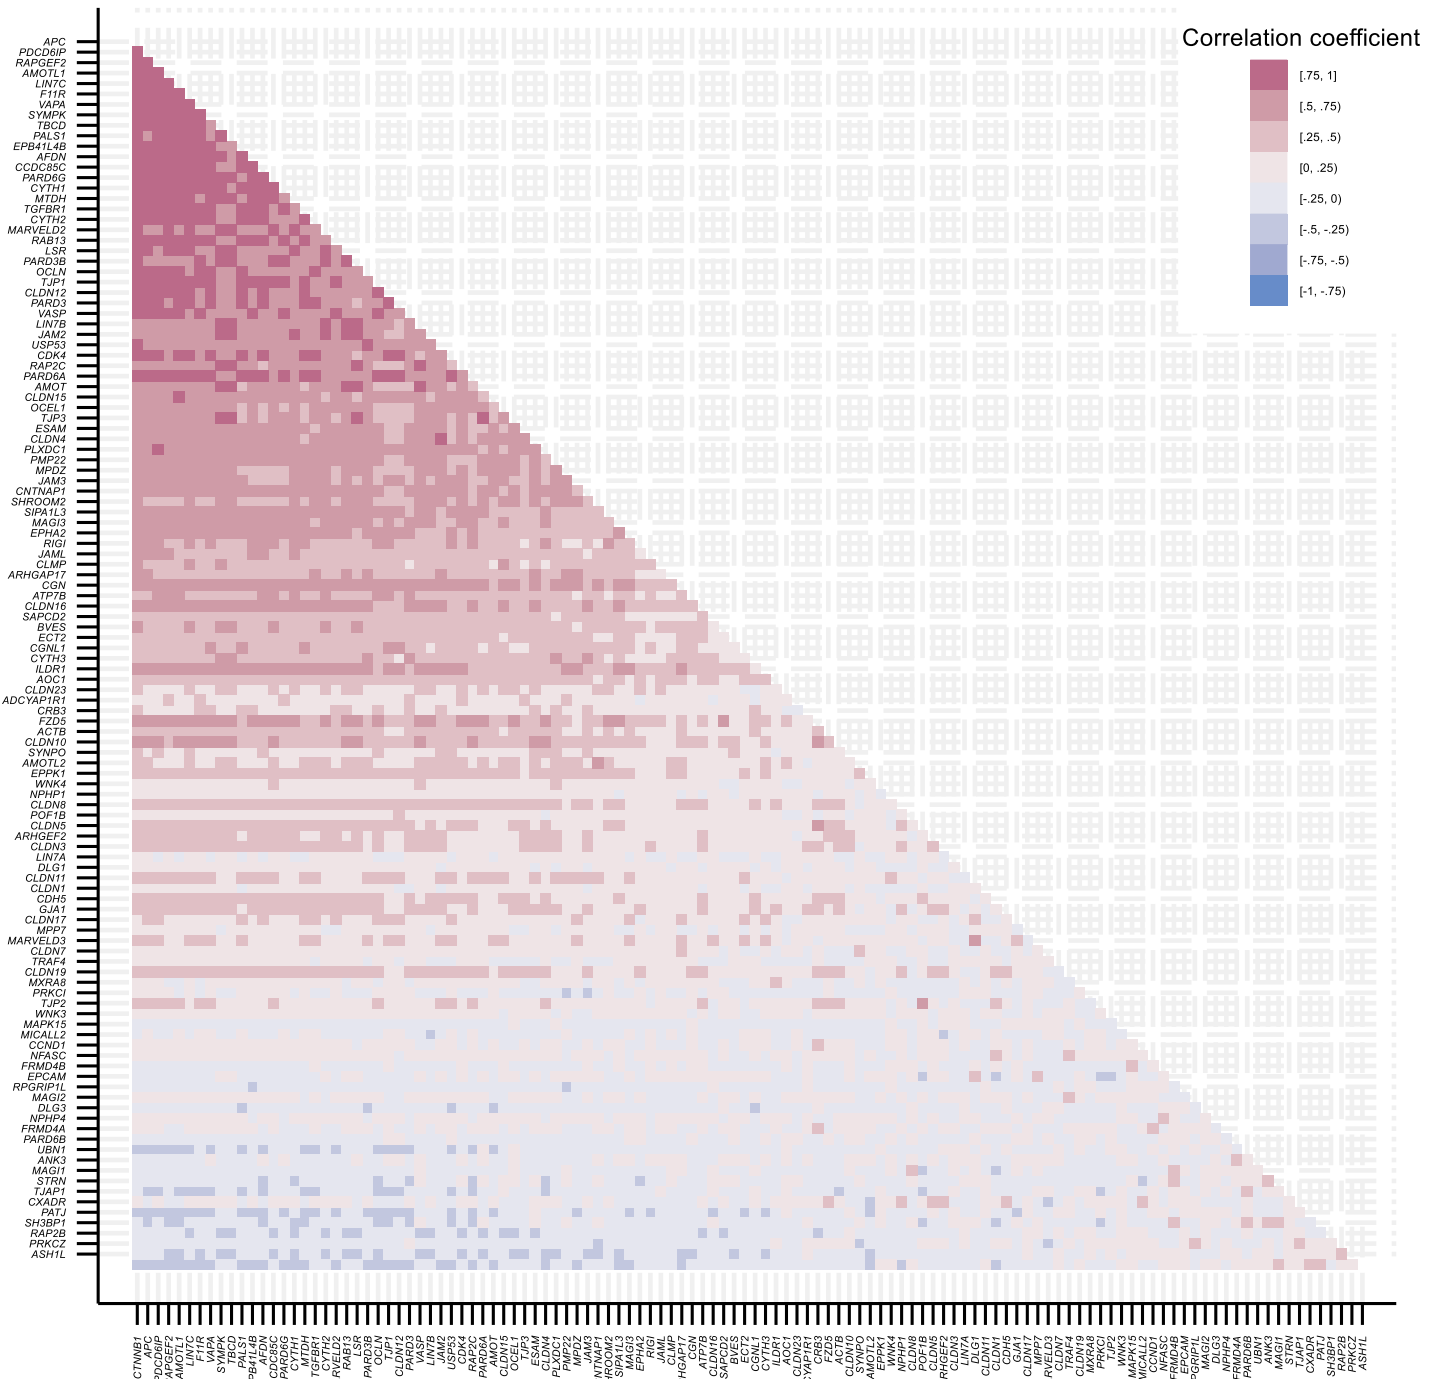

**Supplementary Figure 3. Distribution of scores for first principal component, capturing 31% of the variability in expression levels of 118 genes, by trial arm.** Principal components analysis was used to generate a new variable (the first principal component; component 1) comprising a linear combination of the 118 TJ gene expression levels and capturing 31% of their variability; a high score for this component represents high expression levels for many of the TJ genes, while a low score for this component represents low expression levels for many of the TJ genes. Boxplots show the distribution of scores for the first principal component, with values indicated on the y-axis. Distributions are shown separately by the type of PrEP received by participants, as indicated on the x-axis.

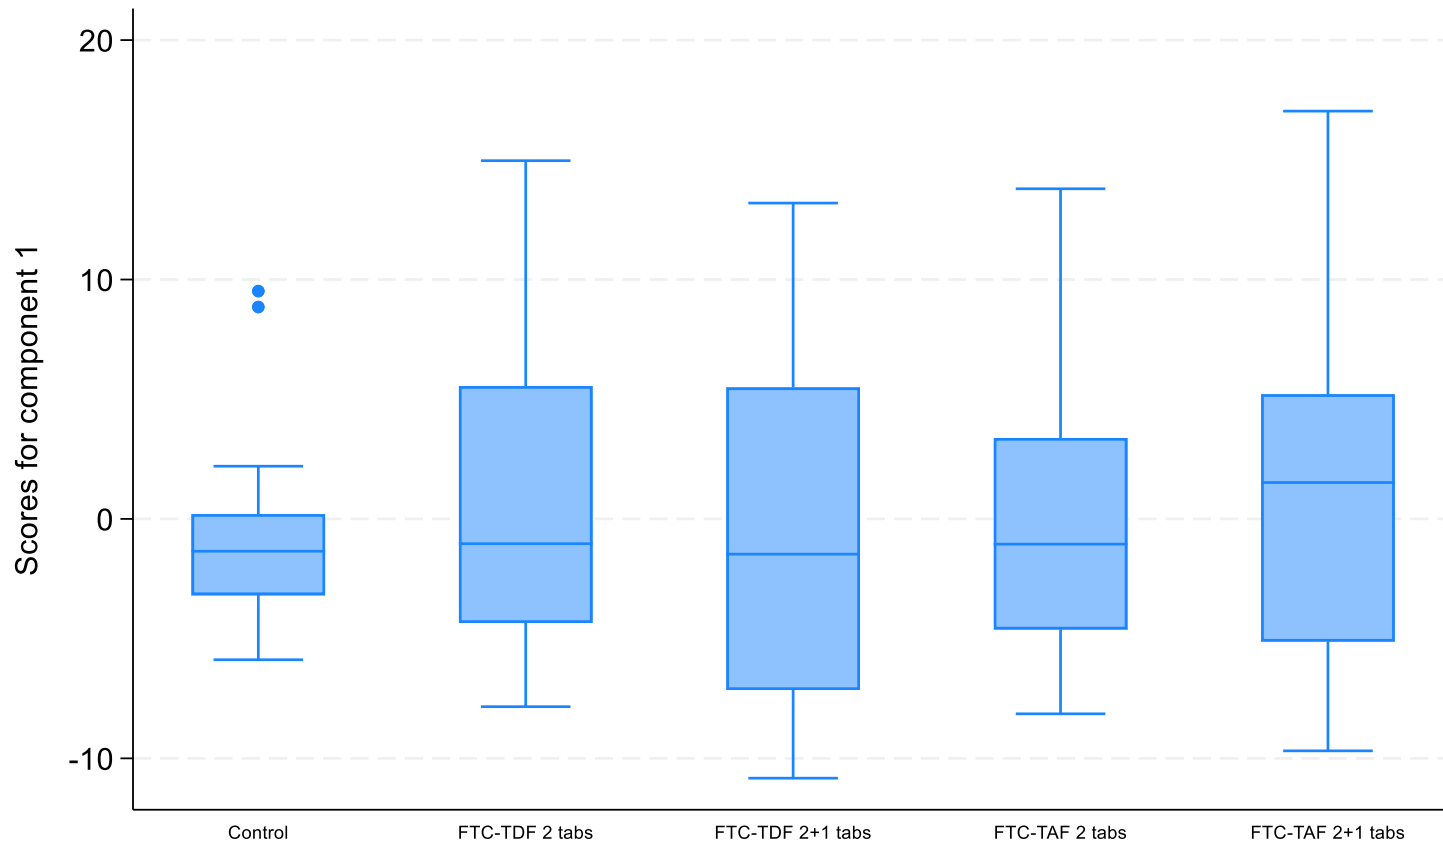



**Supplementary Figure 4. Correlation between scores from first principal component (representing 31% of the variability in the 118 genes) and cytokine gene counts.** Principal components analysis was used to generate a new variable (the first principal component; component 1) comprising a linear combination of the 118 TJ gene expression levels and capturing 31% of their variability; a high score for this component represents high expression levels for many of the TJ genes, while a low score for this component represents low expression levels for many of the TJ genes. Each graph shows a scatterplot of the first component score (y-axis) plotted against the cytokine gene counts (x-axis). On each graph, participants from South Africa are shown in grey while participants from Uganda are shown in red. Spearman's correlation coefficients for the correlation between the first component score and the gene count were calculated separately for each country and are indicated on each graph.

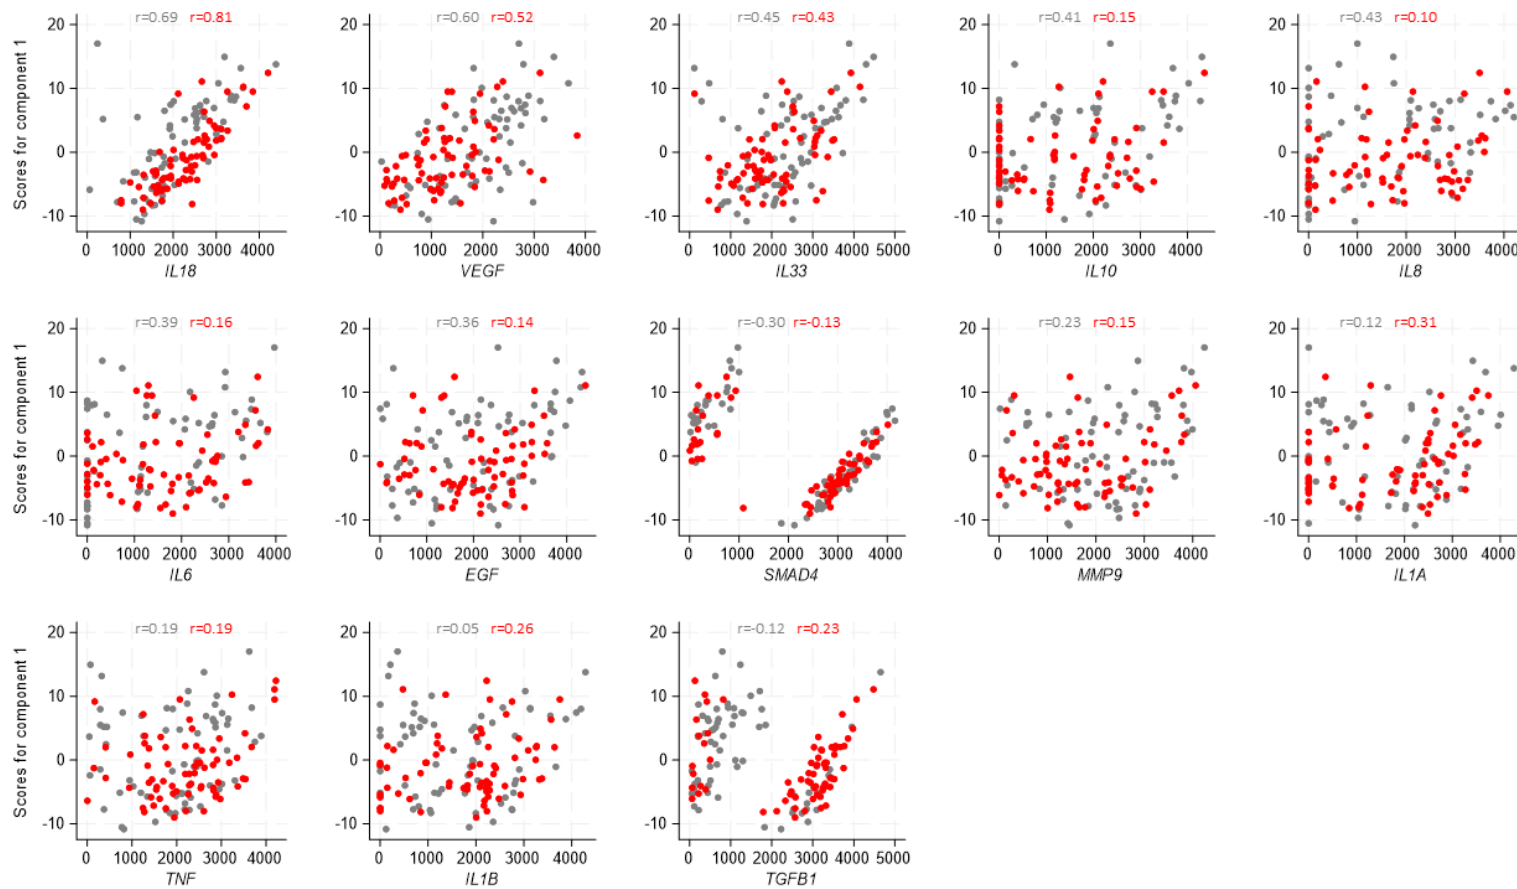

**Supplementary Figure 5. Representative western blot for tight junction levels in foreskin tissue.** Nitrocellulose membranes were cut in four sections and blotted with anti-ZO-1, anti-OCLN, anti-CLDN-1 or anti- $\beta$ -actin antibodies. Image shown is from 13 samples loaded on one gel by date of enrolment.

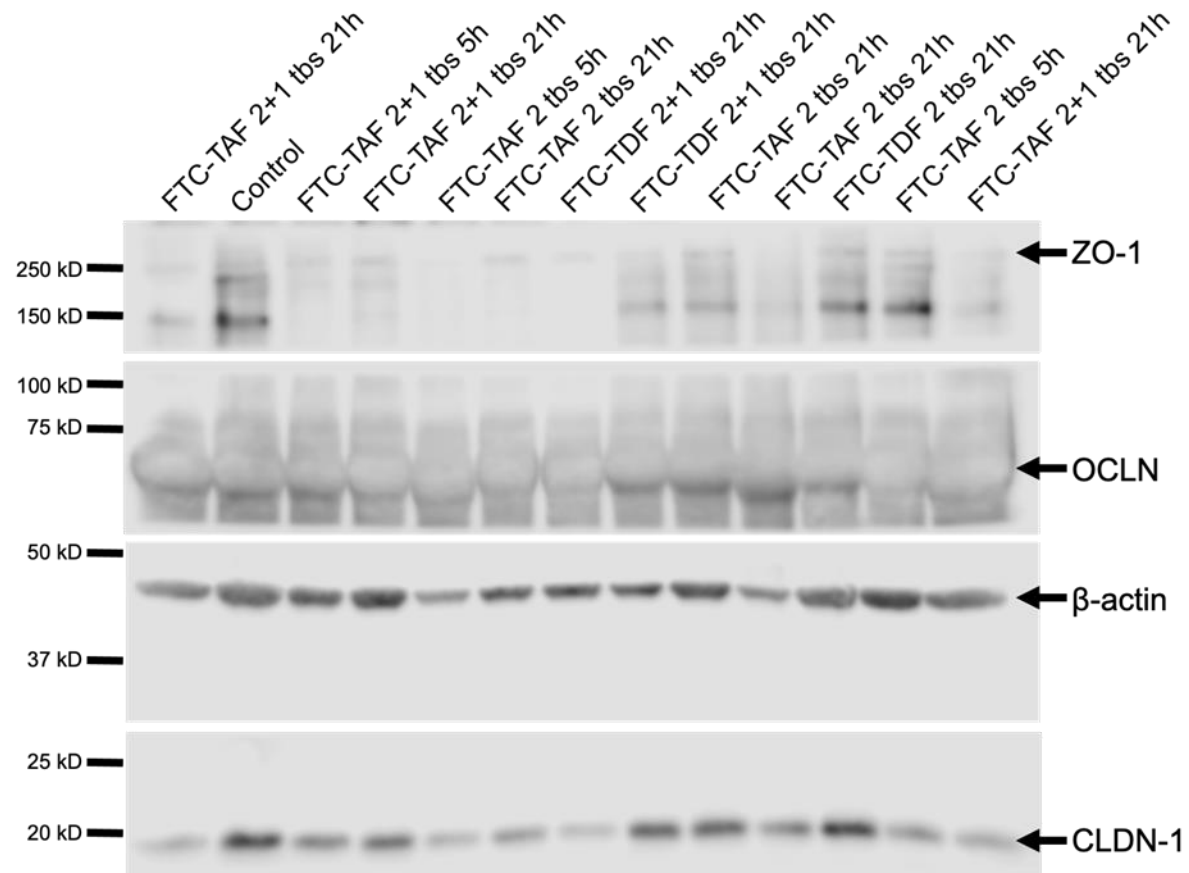

Supplement: DataSheet1.pdf [file DataSheet1.pdf]
